# Supplementary material for: Inequalities in realised access to healthcare among recently arrived refugees depending on local access model: study protocol for a quasi-experimental study
Source: PubMed Central journal article supplement — BMJ Open. 2019 May 30;9(5):e027357. doi: 10.1136/bmjopen-2018-027357 (PMC6550014; doi:10.1136/bmjopen-2018-027357), 2019-05-30
Supplement: bmjopen-2018-027357.draft_revisions.pdf [file bmjopen-2018-027357.draft_revisions.pdf]

# BMJ Open

BMJ Open is committed to open peer review. As part of this commitment we make the peer review history of every article we publish publicly available.

When an article is published we post the peer reviewers' comments and the authors' responses online. We also post the versions of the paper that were used during peer review. These are the versions that the peer review comments apply to.

The versions of the paper that follow are the versions that were submitted during the peer review process. They are not the versions of record or the final published versions. They should not be cited or distributed as the published version of this manuscript.

BMJ Open is an open access journal and the full, final, typeset and author-corrected version of record of the manuscript is available on our site with no access controls, subscription charges or pay-per-view fees (<http://bmjopen.bmj.com>).

If you have any questions on BMJ Open's open peer review process please email [info.bmjopen@bmj.com](mailto:info.bmjopen@bmj.com)

# BMJ Open

## Inequalities in realized access to health care among recently arrived refugees depending on local access model: study protocol for a quasi-experimental study

|                               |                                                                                                                                                                                                                                                                                                                                                                                                                                                                                                                                                               |
|-------------------------------|---------------------------------------------------------------------------------------------------------------------------------------------------------------------------------------------------------------------------------------------------------------------------------------------------------------------------------------------------------------------------------------------------------------------------------------------------------------------------------------------------------------------------------------------------------------|
| Journal:                      | <i>BMJ Open</i>                                                                                                                                                                                                                                                                                                                                                                                                                                                                                                                                               |
| Manuscript ID                 | bmjopen-2018-027357                                                                                                                                                                                                                                                                                                                                                                                                                                                                                                                                           |
| Article Type:                 | Protocol                                                                                                                                                                                                                                                                                                                                                                                                                                                                                                                                                      |
| Date Submitted by the Author: | 18-Oct-2018                                                                                                                                                                                                                                                                                                                                                                                                                                                                                                                                                   |
| Complete List of Authors:     | Wenner, Judith; Bielefeld University, School of Public Health, Dept. of Epidemiology & International Public Health<br>Rolke, Kristin; Bielefeld University, School of Public Health, Dept. of Epidemiology & International Public Health<br>Breckenkamp, Jürgen; Bielefeld University, Epidemiology and International Public Health<br>Sauzet, Odile; Universität Bielefeld,<br>Bozorgmehr, Kayvan; University Heidelberg, General Practice and Health Services Research<br>Razum, Oliver; Bielefeld University, Epidemiology and International Public Health |
| Keywords:                     | refugee health, access to health care, quasi-experimental design, Health policy < HEALTH SERVICES ADMINISTRATION & MANAGEMENT, Organisation of health services < HEALTH SERVICES ADMINISTRATION & MANAGEMENT, PUBLIC HEALTH                                                                                                                                                                                                                                                                                                                                   |
|                               |                                                                                                                                                                                                                                                                                                                                                                                                                                                                                                                                                               |

SCHOLARONE™  
Manuscripts

1  
2  
3 1 **Title Page**  
4  
5

6  
7 2 **Inequalities in realized access to health care among recently arrived refugees**  
8  
9 3 **depending on local access model: study protocol for a quasi-experimental study**  
10  
11

12  
13 4 Judith Wenner (Corresponding Author), M.Sc., Dept. of Epidemiology & International Public  
14  
15 Health, School of Public Health, Bielefeld University, P.O. Box 10 01 31, 33501 Bielefeld,  
16  
17 Germany, [Judith.wenner@uni-bielefeld.de](mailto:Judith.wenner@uni-bielefeld.de)  
18  
19  
20  
21  
22

23 8 Kristin Rolke, M.Sc., Dept. of Epidemiology & International Public Health, School of Public  
24  
25 Health, Bielefeld University, P.O. Box 10 01 31, 33501 Bielefeld, Germany, [kristin.rolke@uni-](mailto:kristin.rolke@uni-)  
26  
27 [bielefeld.de](mailto:kristin.rolke@uni-bielefeld.de)  
28  
29  
30  
31  
32

33 12 Dr. Jürgen Breckenkamp, Dept. of Epidemiology & International Public Health, School of Public  
34  
35 Health, Bielefeld University, P.O. Box 10 01 31, 33501 Bielefeld, Germany,  
36  
37 [juergen.breckenkamp@uni-bielefeld.de](mailto:juergen.breckenkamp@uni-bielefeld.de)  
38  
39  
40  
41  
42

43 16 Dr. Odile Sauzet, Dept. of Epidemiology & International Public Health, School of Public Health,  
44  
45 Bielefeld University, P.O. Box 10 01 31, 33501 Bielefeld, Germany, [odile.sauzet@uni-bielefeld.de](mailto:odile.sauzet@uni-bielefeld.de)  
46  
47  
48  
49

50 19 Dr. Kayvan Bozorgmehr, MD, M.Sc., Dept. of General Practice and Health Services Research  
51  
52 University Hospital Heidelberg, Voßstraße 2, D-69115 Heidelberg, Germany,  
53  
54 [kayvan.bozorgmehr@med.uni-heidelberg.de](mailto:kayvan.bozorgmehr@med.uni-heidelberg.de)  
55  
56  
57  
58  
59  
60

1  
2  
3 22  
4  
5  
6 23 Prof. Dr. Oliver Razum, MD, M.Sc., Dept. of Epidemiology & International Public Health, School  
7  
8 24 of Public Health, Bielefeld University, P.O. Box 10 01 31, 33501 Bielefeld, Germany,  
9  
10 25 [oliver.razum@uni-bielefeld.de](mailto:oliver.razum@uni-bielefeld.de)  
11  
12  
13 26  
14  
15

16 27 **Word count of main text: 3774**  
17  
18

## 19 28 **Abstract**

20  
21  
22  
23 29 Introduction: In many countries, including Germany, newly arriving refugees face specific  
24  
25  
26 30 entitlement restrictions and access barriers to health care. While entitlement restrictions apply  
27  
28 31 to all refugees that seek protection in Germany during the first months, the barriers to access  
29  
30  
31 32 depend on the model that the states and the municipalities implement locally. Currently, two  
32  
33 33 different models exist: the health care voucher model (HcV) and the electronic health card model  
34  
35 34 (eHC). Aim of the study is to analyse the consequences of these two different access models for  
36  
37 35 newly arrived refugees' realized access to health care.  
38  
39  
40

41 36 Methods and analysis: The random assignment of refugees to municipalities allows for a quasi-  
42  
43  
44 37 experimental design by comparing realized access to health care among refugees in six  
45  
46 38 municipalities in North Rhine-Westphalia (NRW) which have implemented HcV or eHC. We  
47  
48 39 compare realized access to health care using ambulatory care sensitive conditions and health  
49  
50 40 expenditure as outcome indicators and use of emergency care, preventive care,  
51  
52 41 psychotherapeutic or psychiatric care, and use of therapeutic devices as process indicators.  
53  
54  
55  
56  
57  
58  
59  
60

1  
2  
3 42 Results will be adjusted for aggregated information on age, sex, socioeconomic structure of the  
4  
5  
6 43 municipalities and density of general or specialized practitioners.  
7

8  
9 44 Ethics and dissemination: We cooperated with local welfare offices and the statutory health  
10  
11 45 insurance for data collection. Thereby, we were able to avoid recruiting large numbers of refugee  
12  
13  
14 46 patients immediately at arrival for health service research – while their access and entitlement to  
15  
16 47 health care is limited at that time. We developed an extensive data protection concept and  
17  
18 48 ensured that all data collected is fully anonymized. Results will be published in peer-review  
19  
20  
21 49 journals and summarized in reports to the funding agency.  
22  
23  
24  
25  
26  
27

50

## 51 **Strengths and limitations of this study**

- 52 • Our study comprises a large and diverse sample of newly arrived refugees that are usually  
53 excluded from health system research and official health reporting.
- 54 • Refugees are randomly assigned to different municipalities which allows us to realize a  
55 quasi-experimental research design.
- 56 • Selection bias might lead to underestimated effects as municipalities with very restrictive  
57 refugee health policies are less likely to participate.
- 58 • Demographic information is not collected on the individual, but on the aggregated level.

59

## 60 **Key Words**

1  
2  
3 61 Refugee health, access to health care, quasi-experimental design, health policy, organization of  
4  
5  
6 62 health services, public health  
7  
8  
9  
10  
11  
12  
13  
14  
15  
16  
17  
18  
19  
20  
21  
22  
23  
24  
25  
26  
27  
28  
29  
30  
31  
32  
33  
34  
35  
36  
37  
38  
39  
40  
41  
42  
43  
44  
45  
46  
47  
48  
49  
50  
51  
52  
53  
54  
55  
56  
57  
58  
59  
60

For peer review only

## 63 MAIN TEXT

## 64 INTRODUCTION

65 In many countries, newly arriving refugees face specific entitlement restrictions and access  
66 barriers to health care.[1,2] These regulations have been discussed from ethical, human rights  
67 and legal perspective.[3–5] While we acknowledge the importance of these fundamental debates,  
68 our study focuses on the actual consequences of these regulations for the use of health care  
69 among recently arrived refugees. We concentrate on the regulations that apply to refugees during  
70 their first years after arrival as we consider this time to be a socially critical period, (as defined by  
71 Bartley et al. [6]), and as such as decisive for the further course of individual's life and the  
72 development of social or health inequalities.

73 During the first 15 months after arrival, the level of entitlement to health care is restricted and  
74 the formal access to health care is not equal to that of persons covered via the statutory health  
75 insurance. Entitlement is restricted by article 4 and 6 of the Asylum Seekers Benefits Act  
76 (AsylbLG). The AsylbLG covers the costs of health care services in the case of acute illness and pain,  
77 pregnancy and birth as well as for officially recommended vaccination and medically necessary  
78 check-ups. Other services, for example diagnoses and treatment of non-acute chronic illness or  
79 (long-term) psychotherapy, are only granted on a case-by-case basis.[7] Among persons facing  
80 these restrictions, hospitalizations and emergency care use is increased while prescriptions and  
81 dental visits are decreased compared to persons regularly insured via the statutory health  
82 insurance, showing that these legal regulations actually shape patterns of health care use.[8]

1  
2  
3 83 Besides these entitlement restrictions that apply to all newly arrived refugees – with the  
4  
5 84 exception of unaccompanied minors – the bureaucratic procedures of how to actually access  
6  
7  
8 85 health care services are identified as barriers to necessary care.[9] Given that these bureaucratic  
9  
10 86 procedures differ between municipalities and federal states, the actual access also differs.  
11  
12  
13 87 Basically, two different access models exist: the electronic health card model (eHC) and the health  
14  
15 88 care voucher mode (HcV) (Fig. 1). The eHC model guarantees access similarly to the statutory  
16  
17 89 health insurance. Refugees receive e-health cards once they are assigned to a municipality. They  
18  
19 90 can directly access health care services presenting the card at the hospital or in a doctor's office,  
20  
21 91 but the entitlement restrictions largely remain. The HcV model constitutes a parallel access model  
22  
23 92 specifically for recently arrived refugees. In municipalities using the HcV model, refugees apply  
24  
25 93 for health care vouchers at the local welfare authorities before accessing care. These health care  
26  
27 94 vouchers are valid usually for three months.[9–11]  
28  
29  
30  
31  
32  
33 95 After usually 15 months, all refugees receive e-health cards and are allowed to join a statutory  
34  
35 96 health insurance. The restrictions of articles 4 and 6 no longer apply (Fig. 1). If their asylum claims  
36  
37 97 have been approved or they take up an employment, this might even happen earlier. In some  
38  
39 98 cases (e.g. when persons have not revealed their identities), the restrictions are extended (Article  
40  
41 99 2 AsylbLG).

42  
43  
44  
45  
46 100 [Fig 1]  
47  
48

49 101 **Figure 1: Health care for newly arrived refugees in Germany: simplified access model and**  
50  
51 102 **entitlement in municipalities** (own illustration)  
52

53  
54 103  
55  
56  
57  
58  
59  
60



1  
2  
3 104 It is on each of the 16 federal states in Germany to decide on an access model for refugees during  
4  
5 105 the first months after arrival. However, the state government in NRW decided to leave it to the  
6  
7 106 municipalities to either opt for the HcV or the eHC model. NRW is the only federal state in which  
8  
9 107 both models are currently used in a considerable number of municipalities. Refugees in NRW are  
10  
11 108 randomly assigned to municipalities – and thereby to the different coexisting access models –  
12  
13 109 after they have stayed in the initial reception centers during the first weeks.  
14  
15  
16  
17

18 110 We hypothesize that the choice of the model affects access to health care, utilization as well as  
19  
20 111 health care expenditures. So far, there has been no quantitative empirical research actually  
21  
22 112 comparing on a larger scale the ways in which these models impact on the actual use of health  
23  
24 113 care, the range of services that can be accessed and the related health care expenditures.  
25  
26 114 However, available research results suggest that the HcV model constitutes a barrier to  
27  
28 115 ambulatory health care,[9] leads to higher health care expenses [12] and might explain – at least  
29  
30 116 partly – the increased use of emergency care among refugees in Germany and the lower  
31  
32 117 utilization of outpatient health care services.[13]  
33  
34  
35  
36  
37  
38

39 118 These research results and the current regulations on access to health care lead to the following  
40  
41 119 overall study hypothesis: The access model (macro level) and its implementation (meso level)  
42  
43 120 influence the access to health care for refugees living in the municipalities (micro level). As a  
44  
45 121 consequence, we expect to observe differences in realized access between individuals (micro  
46  
47 122 level), resulting also in different patterns of realized access on municipality level (meso level) and  
48  
49 123 between access models (macro level) (c.f. Fig. 2).  
50  
51  
52

53  
54 124 [Fig. 2]  
55  
56  
57  
58  
59  
60

1  
2  
3 **Figure 2: Graphical summary of the overall study hypothesis** (own illustration based on,[14] p.  
4 10)  
5

6 127  
7

## 8 **METHODS AND ANALYSIS**

9

### 10 11 12 **Design, setting, participants and sample size**

13

14  
15 130 We here define refugees as all people who recently migrated to Germany seeking legal protection  
16  
17  
18 131 – irrespective of their legal status and the reasons for seeking protection. Refugees are randomly  
19  
20 132 assigned to municipalities. Assignment of refugees takes place according to the population size  
21  
22 133 and spatial extent of the municipalities without prior consideration of their assumed health care  
23  
24 134 needs.[15] As municipalities have implemented different access models (eHC or HcV), a quasi-  
25  
26  
27 135 experimental study design can be realized  
28

29  
30  
31 136 At the end of 2016, 191,312 refugees lived in municipalities in NRW and were entitled to health  
32  
33 137 care services according to article 4 and 6 AsylbLG. Of these, 21.6% (41,348) lived in one of the 20  
34  
35 138 municipalities using the eHC model at that time. In 2017, of the 122,405 recently arrived refugees,  
36  
37 139 23.3% lived in one of the meanwhile 24 municipalities using the eHC model.[16]  
38  
39  
40

41 140 We calculated the sample size based on the primary outcome (ambulatory care sensitive  
42  
43 141 conditions, ACSC). In a similar study, incidence rate of ACSC was 38 per 1000 among refugees  
44  
45 142 living in municipalities with eHC.[8] There was no study investigating the ACSC of refugees living  
46  
47 143 in municipalities with HcV. Based on results from reports and qualitative studies, we estimated  
48  
49 144 an incidence rate of 50 per 1000. With a predefined power of 0.8 and a significance level of 0.05  
50  
51 145 we calculated a sample size of 4750 per group. We decided to include one larger city, one medium  
52  
53 146 size city and one smaller city for each group in order to meet the necessary sample size. In total,  
54  
55  
56  
57  
58

1  
2  
3 147 we thus recruited six municipalities. In these municipalities, all newly arrived refugees entitled to  
4  
5  
6 148 health care through the local welfare offices are included in the study.  
7

8  
9 149 As the number of municipalities with eHC is a comparatively small (22 with eHC compared to 374  
10  
11 150 with HcV), recruitment starts among the 22 eHC-municipalities. As the data access would depend  
12  
13  
14 151 on the willingness of the insurances to participate in the project, recruitment will be realized  
15  
16 152 through the statutory health insurance companies. The municipalities should differ in population  
17  
18 153 size and organizational structure (independent city or district-affiliated city). Subsequently, we  
19  
20  
21 154 apply purposive sampling to recruit municipalities using the HcV model, considering their  
22  
23 155 population size and organizational structure. As we were able to include all refugees entitled to  
24  
25  
26 156 services during the study period, no further sampling was necessary.  
27

28  
29 157 Data collection started in June 2018 and will last until beginning of 2019. Data has to be collected  
30  
31 158 retrospectively, as health care providers need several months for controlling and billing.  
32  
33  
34 159 Ultimately, we will include data on health care use for seven subsequent quarters (2-2016 until  
35  
36 160 4-2017) to be able to compare differences between municipalities and over time.  
37  
38

### 39 40 161 **Variables and data sources**

41  
42  
43 162 For municipalities using the HcV model, all demographic data and data on used of health care  
44  
45 163 services has to be collected directly at the local welfare office or from the external service  
46  
47  
48 164 provider if the municipalities have outsourced the verification and payment of invoices. In  
49  
50 165 municipalities which have implemented the eHC model, data has to be collected from the  
51  
52  
53 166 responsible statutory health insurance.[17]  
54  
55  
56  
57  
58  
59  
60

1  
2  
3 167 Data includes principle and secondary diagnoses (ICD-10-Codes), type of care used (primary,  
4  
5 168 specialist, emergency or hospital care), procedures and prescriptions and date of use (quarterly).  
6  
7  
8 169 Quarterly data on number of refugees according to age and sex is inquired separately from the  
9  
10 170 health insurances or the welfare offices. It is available as aggregated information only. Similarly,  
11  
12  
13 171 health care expenditure is available as aggregated variable only.  
14  
15

16 172 *Outcomes: realized access*  
17

18  
19 173 The primary outcome we are interested in is realized access to health care. The only available  
20  
21 174 data that might serve as an indicator of access to health care are use of health care services and  
22  
23 175 related expenditures. Given that expenditures are the direct consequence of use and thus  
24  
25 176 primarily determined by use, we initially focus here on the relationship between access and use.  
26  
27 177 In line with the “Behavioral Model of Health Service Use” developed and updated by Ronald M  
28  
29 178 Anderson, we consider use to be equal to realized access and thereby a suitable proxy for  
30  
31 179 access.[18] The available claims data does not allow for analysis of more complex concepts of  
32  
33 180 access – e.g. as the fit between the individuals’ and the systems’ characteristics.[19] Use and  
34  
35 181 expenditure are generalized measures that need hypothesis-based concretization. We developed  
36  
37 182 three sub-hypothesis on the effects of the HcV model on use and thereby also on local health care  
38  
39 183 expenditure. Either explicitly or implicitly it is suggested that the hypothesized effects are absent  
40  
41 184 in municipalities using the eHC model. All three hypotheses thus refer to differences in use and  
42  
43 185 expenditure between refugees in municipalities using health vouchers (exposed) and refugees in  
44  
45 186 municipalities issuing e-health cards (unexposed). For each sub-hypothesis, we operationalize  
46  
47 187 suitable outcome measures.  
48  
49  
50  
51  
52  
53  
54  
55  
56  
57  
58  
59  
60

1  
2  
3 188 1) Emergency care  
4  
5

6 189 Health care vouchers are said to complicate access to care – especially to primary or specialized  
7  
8  
9 190 ambulatory care.[13] The vouchers are valid only for three months, they are not always known  
10  
11 191 by the health professionals, and they immediately show that a person has no full entitlement to  
12  
13  
14 192 health care. Patients might delay use or refrain from using ambulatory services to avoid applying  
15  
16 193 for and showing the vouchers. There is no need to present the health care voucher for emergency  
17  
18 194 care.[9,20–23] As a consequence, we assume a higher use of emergency care services. We  
19  
20  
21 195 calculate incidence rates of emergency cases (=outcome 1) and relative risks for each quarter. If  
22  
23 196 the emergency case led to hospitalization, only the date of admission is considered. We count  
24  
25  
26 197 emergency cases (even if a person uses emergency services several times per quarter) and relate  
27  
28 198 the cases to the number of persons eligible to services according to AsylbLG Article 4 and 6. We  
29  
30  
31 199 also count the number of individuals that have used emergency services at least once in the  
32  
33 200 quarter. For individual level regression analysis, a dichotomous outcome variable will be coded  
34  
35 201 containing the information whether or not an individual had used emergency care in the quarter.  
36  
37  
38 202 For ecological regression analysis, quarterly incidence of emergency cases in the six municipalities  
39  
40  
41 203 will serve as outcome variable.  
42  
43

44 204 2) Delayed treatment  
45  
46

47 205 The necessary additional effort to access care in municipalities with HcV model might also lead to  
48  
49 206 delays in treatment. Instead of accessing primary care, patients might delay treatment until  
50  
51  
52 207 hospitalization is necessary. Hospitalizations that could have been avoided with adequate  
53  
54 208 outpatient care are defined as ambulatory care sensitive hospitalizations (ACSH). Usually, ACSH  
55  
56  
57  
58  
59  
60

1  
2  
3 209 are identified based on the related diagnoses. Accordingly, ambulatory care sensitive conditions  
4  
5  
6 210 (ACSC) are thus defined as “conditions for which good outpatient care can potentially prevent the  
7  
8 211 need for hospitalization, or for which early intervention can prevent complications or more severe  
9  
10 212 disease”[25, p.1]. ASCH are considered to be a valid indicator of access barriers to ambulatory  
11  
12  
13 213 care in general [25–28] and have been also identified as a useful indicator of access to primary  
14  
15 214 ambulatory care among forced migrants.[8,29,30] Several different catalogues of ACSC have been  
16  
17  
18 215 developed internationally. Recently, they have been adapted and validated for the German  
19  
20 216 context.[31] The full list of ACSC consists of 40 diagnoses groups with 22 being considered as core  
21  
22 217 diagnosis groups. The full list compiled by Sundmacher et al. includes 258 ambulatory sensitive  
23  
24  
25 218 ICD-10 codes.[32] For children, we use a slightly modified list developed by Lichtl et al.[30] Based  
26  
27  
28 219 on this lists, we define ambulatory care sensitive cases (=outcome 2) and calculate incidence rates  
29  
30 220 per quarter in municipalities using the HcV model and the eHC model (with N being all refugees  
31  
32 221 entitled to services in the quarter). We compare incidence rates over time and between  
33  
34  
35 222 municipalities. We also calculate relative risk comparing the incidence between models. Again we  
36  
37 223 calculate incidence rates (counting all cases even if one person has several ACSC diagnosed) and  
38  
39  
40 224 in addition the share of individuals with at least one ASCS per quarter. As described for outcome  
41  
42 225 1, we use a dichotomous outcome variable and the quarterly incidence as outcomes for  
43  
44  
45 226 regression analysis. If the number of cases allows, we further differentiate between ACSC cases  
46  
47 227 with regular referral and emergency ACSC cases where the patients have been hospitalized after  
48  
49  
50 228 visiting or being brought to the emergency department.

51  
52  
53 229 3) Non-urgency of treatment  
54  
55  
56  
57  
58  
59  
60

1  
2  
3 230 The delay in treatment and the increase in emergency care use or hospitalizations might not  
4  
5  
6 231 materialize during the observation period (first 15 months) as assumed in hypothesis 1 and 2  
7  
8 232 (above), but afterwards, once the entitlement restrictions cease to apply and e-health cards are  
9  
10 233 issued for all. During the observation period, this would still result in a lower use of outpatient  
11  
12 234 cases (primary care) among refugees living in municipalities with a health care voucher –  
13  
14  
15 235 especially for deferrable services such as check-ups or prevention.[13] The participation in  
16  
17 236 medically necessary check-ups (Z- codes according to ICD-10-GM) has been used as outcome  
18  
19 237 measure for access barriers and discrimination related to minority or migration status.[22,33,34]  
20  
21 238 However, the use of preventive care (=outcome 3) as outcome is conditioned on the size of the  
22  
23 239 population groups entitled to preventive services (pregnant women, children, elderly) in the  
24  
25 240 available data and the quality of information on age and sex. If information on age and sex is not  
26  
27 241 detailed enough, we only include the incidence of persons using outpatient care among all people  
28  
29 242 entitled to care in the quarter – also differentiating between ambulatory and specialized care. As  
30  
31 243 mentioned earlier, dental care will be excluded from the analysis.  
32  
33  
34  
35  
36  
37

38 244 In addition to postponing preventive care (which should be refunded according to article 4  
39  
40 245 AsylbLG in all municipalities), municipalities using the HcV model might refuse to refund services  
41  
42 246 as part of the case-by-case review (Art. 6 AsylbLG) referring to the non-urgency of the treatment  
43  
44 247 (*Kriterium der Aufschiebbarkeit*). The framework agreement on the e-health card abolishes any  
45  
46 248 consideration of non-urgency of treatment. Thus, in municipalities using the e-health cards, most  
47  
48 249 services are granted irrespective of their urgency. However, in municipalities using the HcV model  
49  
50 250 urgency of treatment might still be considered. Psychotherapy and therapeutic devices  
51  
52 251 (“Hilfsmittel”) have been identified as services for which the consideration of urgency might lead  
53  
54  
55  
56  
57  
58  
59  
60

1  
2  
3 252 to differences in realized access.[3,35–37] We thus compare psychotherapeutic care cases  
4  
5  
6 253 (outcome 4) and refunded therapeutic devices (outcome 5) between access models. Cases of  
7  
8 254 psychotherapeutic care are defined as visits to specialized doctors (psychiatrists and  
9  
10 255 psychological psychotherapists) and not based on diagnoses. For psychotherapeutic care,  
11  
12  
13 256 repeated visits by the same person in the same quarter are not counted separately. For  
14  
15 257 therapeutic devices, prescriptions for the same device for the same person in the same quarter  
16  
17  
18 258 are not counted separately. Incidence rates and relative risk are calculated for each quarter  
19  
20 259 comparing risks between models and over time.  
21  
22

23 260 *Outcomes: expenditures*  
24  
25

26  
27 261 So far, we only referred to the ACSC as outcome indicator and several process indicators related  
28  
29 262 to health care use. However, data on health care expenditure is available (excluding  
30  
31 263 administrative costs). This allows us to relate our indicators of use to the related health care  
32  
33 264 expenditure in the municipalities. We assume the following consequences for per capita  
34  
35 265 expenditure:  
36  
37  
38  
39

40 266 1) Expenditures on emergency care  
41  
42

43 267 In line with the hypothesis on *emergency care*, the HcV access model goes along with higher use  
44  
45 268 of emergency care and thereby leads to higher health care expenditures for emergency care per  
46  
47 269 capita (per quarter) in municipalities using the HcV model compared to municipalities with eHC  
48  
49 270 model.  
50  
51  
52

53 271 2) Expenditures related to delayed treatment  
54  
55  
56  
57  
58  
59  
60



1  
2  
3 272 In line with the hypothesis on *delayed treatment*, the HcV access model goes along with higher  
4  
5  
6 273 risk for ambulatory care sensitive hospitalizations. We therefore assume higher health care  
7  
8 274 expenditures for inpatient care per capita (per quarter) in municipalities using the HcV model  
9  
10  
11 275 compared to municipalities with eHC model.  
12

### 13 14 276 3) Expenditures related to the non-urgency of treatment 15

16  
17 277 The HcV access model is hypothesized to go along with lower use of preventive, psychiatric,  
18  
19 278 psychotherapeutic (outpatient) care and therapeutic devices if the use of these services are  
20  
21  
22 279 postponed or considered as non-urgent by the municipalities. As a consequence, we assume to  
23  
24 280 observe lower health care expenditures for outpatient care per capita (per quarter) in  
25  
26  
27 281 municipalities using the HcV model compared to municipalities with eHC model.  
28

29  
30 282 Health care expenditure per capita and quarter in the municipalities will thus be differentiated  
31  
32 283 according to inpatient, outpatient and emergency care and interpreted against the backdrop of  
33  
34  
35 284 the results from the analysis of realized access. More detailed analysis of expenditures for specific  
36  
37 285 health services are not feasible as information on expenditures are only available on aggregated  
38  
39  
40 286 level.  
41

### 42 43 287 *Covariates or confounders* 44

45  
46 288 The major determinant of health care use we are interested in is the access model used in the  
47  
48 289 municipalities. However, health care policies and their implementation as locally diverging access  
49  
50  
51 290 models are only one of many determinants of health care use. Andersen and colleagues identified  
52  
53 291 several additional determinants of health care use with the health system being just one of them  
54  
55  
56 292 and access models being just one element of the health system.[18] Thus, a much broader  
57

293 approach is needed given that confounding by other determinants of use of health care services  
 294 is probable. We thus adapted Andersen's general model of Health Service Use with regard to our  
 295 research setting and analyze the availability of data or information for the different determinants  
 296 (c.f. [18,38]).

297 **Table 1: Determinants of health care utilization according to Andersen (1995)**

|                                     | <b>Explanation and concretization<br/>(adapted from [18])</b>            | <b>Availability of information</b>                                                                                                                                                                                                               |
|-------------------------------------|--------------------------------------------------------------------------|--------------------------------------------------------------------------------------------------------------------------------------------------------------------------------------------------------------------------------------------------|
| <b>Predisposing characteristics</b> |                                                                          |                                                                                                                                                                                                                                                  |
| <b>Demographics</b>                 | Age, sex                                                                 | Aggregated data available for all municipalities; individual level data only available from municipalities with eHC                                                                                                                              |
| <b>Social structure</b>             | Socio-economic status, origin/nationality                                | Not available                                                                                                                                                                                                                                    |
| <b>Health beliefs</b>               | Attitudes, values, and knowledge about health or health services         | Not available                                                                                                                                                                                                                                    |
| <b>Enabling resources</b>           |                                                                          |                                                                                                                                                                                                                                                  |
| <b>Individual /family</b>           | Financial means, health insurances                                       | Not available; entitlements to benefits according to AsylbLG are need-based and thus these regulations apply only to people whose financial means are generally limited and who do not have a valid health insurance in Germany (Art. 7 AsylbLG) |
| <b>Community</b>                    | Availability of health personnel and facilities, travel and waiting time | Limited availability: density of general practitioners and specialized doctors [43,44]                                                                                                                                                           |
| <b>Social relationships</b>         | Social support                                                           | Not available                                                                                                                                                                                                                                    |
| <b>Need</b>                         |                                                                          |                                                                                                                                                                                                                                                  |
| <b>Perceived need</b>               | Subjective health                                                        | Not available                                                                                                                                                                                                                                    |
| <b>Evaluated need</b>               | Professional judgments about health care needs (e.g. diagnoses)          | Only available for those who actually used health care and even among those who used health care limited to the condition for which health care was used; the number of severe cases with annual individual health care costs of                 |

|                                  |                                                                                             |                                                                                                                                                                                                                                                                                           |
|----------------------------------|---------------------------------------------------------------------------------------------|-------------------------------------------------------------------------------------------------------------------------------------------------------------------------------------------------------------------------------------------------------------------------------------------|
|                                  |                                                                                             | more than 35.000 € are known for municipalities due to state refunding policies [15]                                                                                                                                                                                                      |
| <b>Health care system</b>        |                                                                                             |                                                                                                                                                                                                                                                                                           |
| <b>Policy</b>                    | Macro characteristics of the health system not further specified by Andersen and colleagues | With exception of the access model and its implementation, this should be the same for all municipalities in NRW                                                                                                                                                                          |
| <b>Resources</b>                 |                                                                                             |                                                                                                                                                                                                                                                                                           |
| <b>Organization</b>              |                                                                                             |                                                                                                                                                                                                                                                                                           |
| <b>External environment</b>      |                                                                                             |                                                                                                                                                                                                                                                                                           |
| <b>Physical</b>                  | Natural and build environment                                                               | Availability very limited: information on types of accommodation in municipalities (central or decentralized) [16]                                                                                                                                                                        |
| <b>Political</b>                 | Political context (global, national, state, local)                                          | No difference between municipalities for global, national and state level; local level: information on population size, organizational structure (e.g. independent city, county-affiliated) [45] and results from local elections as well as the political party of the ruling major [46] |
| <b>Economic</b>                  | Economic structure                                                                          | No difference between municipalities for global, national and state level; local level: data available for municipalities in Germany (unemployment rate, average household purchasing power, age-structure) [45]                                                                          |
| <b>Health practices</b>          |                                                                                             |                                                                                                                                                                                                                                                                                           |
| <b>Personal health practices</b> | Diet, exercise, self-care (not related to seeking care)                                     | Not available                                                                                                                                                                                                                                                                             |

298

299 Table 1 shows that there are important individual-level determinants of use that we are not able

300 to consider (especially socio-economic status, health beliefs, individual enabling resources, need

301 and personal health practices). Given that refugees are almost randomly assigned to the

302 municipalities, our study can be considered as a natural experiment or a quasi-experimental

1  
2  
3 303 study. Under these quasi-experimental conditions, the determinants should be independent of  
4  
5  
6 304 the access model. As a result, confounding by these determinants of use should be minimized.  
7  
8 305 We still control for significant differences in demographic characteristics that persist despite  
9  
10 306 random assignment, based on the available aggregated data on sex and age. As listed in Table 1,  
11  
12 307 information on important contextual, health system and community related determinants are  
13  
14  
15 308 available. This is the case for availability of doctors, overall socio-demographic, economic and  
16  
17 309 political context are (partly) available. Adjustment for these aspects is thus possible at  
18  
19  
20 310 municipality level.  
21  
22

### 23 311 **Planned statistical analysis**

24  
25  
26  
27 312 We aim to shed light on the development of health inequalities in the socially critical phase  
28  
29 313 refugees face immediately after arrival in Germany and the importance of the local context in  
30  
31 314 providing access to health care. However, we analyze inequalities only in the sense of (descriptive)  
32  
33 315 differences and not in the sense of inequities which constitutes a separate interpretative step.  
34  
35  
36  
37 316 Incidence rates and relative risks of all five outcomes are analyzed for seven quarters comparing  
38  
39 317 municipalities with eHC and with HcV. Timing and pathways of care will also be explored. Analysis  
40  
41 318 will be adjusted for aggregated information on age and sex provided by the municipalities. As part  
42  
43 319 of the descriptive analysis we will also compare health care expenditures in the municipalities.  
44  
45  
46  
47 320 Subsequently, we will perform a multivariate regression analysis. As the detailedness of the data  
48  
49 321 is limited (few municipalities and no individual level data on age and sex), we explore different  
50  
51 322 possible statistical analysis and compare the results. In ecological analysis, we use general linear  
52  
53  
54 323 regression models with quarterly incidence rates in the six municipalities as outcomes. In  
55  
56  
57  
58  
59  
60

1  
2  
3 324 individual level analysis, we include each of the outcomes as (dependent) outcome variable, the  
4  
5 325 access model as (independent) exposure variable and conduct repeated (7 quarters) cross-  
6  
7  
8 326 sectional regression analysis. In both cases, we will include the age-sex distribution, socio-  
9  
10 327 economic and political structure of the community and density of general and specialized  
11  
12  
13 328 practitioners respectively as covariates in the regression models (c.f. Table 1).  
14  
15

### 16 329 **Public and patient involvement**

17  
18  
19 330 The described quantitative study is embedded in a larger mixed-methods project. As part of the  
20  
21  
22 331 project, we conduct qualitative semi-structured interviews (not described in detail here) with  
23  
24 332 actors in welfare agencies, social workers, health care providers and refugees in all six  
25  
26  
27 333 municipalities. Interview material will be analyzed to understand how the models are actually  
28  
29 334 implemented in the municipalities and how access is organized from the perspective of  
30  
31  
32 335 providers and patients. Their perspectives and needs are also considered during data collection  
33  
34 336 and analysis. The final results will be discussed with interviewees in the six municipalities.  
35  
36

### 37 337 **ETHICS AND DISSEMINATION**

38  
39  
40  
41 338 Research evaluating the (health) consequences of legal provisions for newly arrived refugees'  
42  
43 339 access to health care in a methodologically and ethically sound way constitutes a challenge.  
44  
45  
46 340 Refugees are usually not included or not identifiable in the official health reporting  
47  
48 341 systems.[39,40] In addition, we know from previous research that it is difficult to recruit newly  
49  
50  
51 342 arrived refugees on a large scale due to language differences, frequent relocations and assumed  
52  
53 343 low response rates.[41,42] Inequalities stemming from different formal access to health care are  
54  
55  
56 344 thus not easily detectable. As a consequence, we need new methodological approaches to  
57  
58  
59  
60

1  
2  
3 345 document possible inequalities – which might increase their visibility and ultimately contribute to  
4  
5 346 their reduction. At the same time, it is ethically questionable to recruit large numbers of refugees  
6  
7  
8 347 for quantitative health service research shortly after arrival in their new country of residency –  
9  
10 348 while their access and entitlement to health care is still restricted.

11  
12  
13 349 In order to overcome these difficulties, we cooperated with local welfare offices and the statutory  
14  
15 350 health insurance to collect data on use of health care among newly arrived refugees. We ensured  
16  
17 351 that data collection would lead to fully anonymized (and even partly aggregated) data, so there  
18  
19 352 was no need to seek consent from individuals and conduct interviews. This approach and the full  
20  
21 353 study have been approved by the ethical committee and the data protection office at Bielefeld  
22  
23 354 University (application no. 2017-099, 10<sup>th</sup> May 2017).

24  
25  
26 355 We developed a data protection concept in close cooperation with the data protection officer  
27  
28 356 and our study data trustee. Data will be managed, analyzed and stored on encoded offline servers.  
29  
30 357 Ten years after the end of the study, the data trustee will delete the data. Results will be published  
31  
32 358 in peer-reviewed journals and summarized in reports to the funding agency.  
33  
34  
35  
36  
37  
38  
39  
40  
41  
42  
43  
44  
45

359

360

## 361 LITERATURE

- 362 1 Norredam M, Mygind A, Krasnik A. Access to health care for asylum seekers in the  
363 European Union- A comparative study of country policies. *Eur J Public Health*  
364 2006;**16**:285–9. doi:10.1093/eurpub/cki191

- 1  
2  
3 365 2 International Organization for Migration (IOM) Regional Office Brussels. Migration Health  
4  
5  
6 366 Division (MHD). *Summary Report on the MIPEX Health Strand and Country Reports*.  
7  
8 367 Brussels: : International Organization for Migration (IOM) Regional Office Brussels,  
9  
10 368 Migration Health Division (MHD) 2016.  
11  
12  
13 369 [http://members.costadapt.eu/images/3/33/MIPEX\\_11\\_June\\_final.pdf](http://members.costadapt.eu/images/3/33/MIPEX_11_June_final.pdf)  
14  
15 370 3 Eichenhofer E. Gesundheitsleistungen für Flüchtlinge. *Zeitschrift für Ausländerr und*  
16  
17 371 *Ausländerpolitik* 2013;**33**:169–75.  
18  
19  
20 372 4 Ooms G, Hammonds R. Global constitutionalism, responsibility to protect, and extra-  
21  
22 373 territorial obligations to realize the right to health: time to overcome the double standard  
23  
24 374 (once again). *Int J Equity Heal* 2014;**13**:68. doi:10.1186/s12939-014-0068-4  
25  
26  
27 375 5 Wild V. Universal Access to Health Care for Migrants: Applying Cosmopolitanism to the  
28  
29 376 Domestic Realm. *Public Health Ethics* 2015;**8**:162–72. doi:10.1093/phe/phv014  
30  
31  
32 377 6 Bartley M, Blane D, Montgomery S. Health and the life course: why safety nets matter.  
33  
34 378 *BMJ Br Med J* 1997;**314**:1194–6.  
35  
36  
37 379 7 Razum O, Wenner J, Bozorgmehr K. Wenn Zufall über den Zugang zur  
38  
39 380 Gesundheitsversorgung bestimmt: Geflüchtete in Deutschland. *Das Gesundheitswes*  
40  
41 381 2016;**78**:711–4. doi:10.1055/s-0042-116231  
42  
43  
44 382 8 Bauhoff S, Göppfarth D. Asylum-seekers in Germany differ from regularly insured in their  
45  
46 383 morbidity, utilizations and costs of care. *PLoS One* 2018;**13**:1–11.  
47  
48 384 doi:10.1371/journal.pone.0197881  
49  
50  
51 385 9 Spura A, Kleinke M, Robra BP, *et al.* Wie erleben Asylsuchende den Zugang zu  
52  
53 386 medizinischer Versorgung? *Bundesgesundheitsblatt - Gesundheitsforsch -*

- 1  
2  
3 387 *Gesundheitsschutz* 2017;**60**:462–70. doi:10.1007/s00103-017-2525-x
- 4  
5  
6 388 10 Wächter-Raquet M. *Einführung der Gesundheitskarte für Asylsuchende und Flüchtlinge.*  
7  
8 389 *Der Umsetzungsstand im Überblick der Bundesländer.* Gütersloh: : Bertelsmann Stiftung  
9  
10 390 2016.
- 11  
12  
13 391 11 Behörde für Arbeit Soziales Familie und Integration der Freien und Hansestadt Hamburg.  
14  
15 392 Gesundheitsversorgung Ausländer. Best Practice Beispiele aus Hamburg. Bericht der  
16  
17 393 Fachtagung am 8. Dezember 2014 in der Landesvertretung Hamburg in Berlin. Hamburg:  
18  
19 394 2014.
- 20  
21  
22 395 12 Bozorgmehr K, Razum O. Effect of Restricting Access to Health Care on Health  
23  
24 396 Expenditures among Asylum-Seekers and Refugees: A Quasi-Experimental Study in  
25  
26 397 Germany, 1994–2013. *PLoS One* 2015;**10**:e0131483. doi:10.1371/journal.pone.0131483
- 27  
28 398 13 Claassen K, Jäger P. Impact of the Introduction of the Electronic Health Insurance Card on  
29  
30 399 the Use of Medical Services by Asylum Seekers in Germany. *Int J Environ Res Public Health*  
31  
32 400 2018;**15**:856. doi:10.3390/ijerph15050856
- 33  
34  
35 401 14 Coleman JS. *Foundations of Social Theory.* Cambridge: : Harvard University Press 1990.
- 36  
37 402 15 Landtag Nordrhein-Westfalen. Gesetz über die Zuweisung und Aufnahme ausländischer  
38  
39 403 Flüchtlinge (Flüchtlingsaufnahmegesetz - FlüAG) vom 28. Februar 2003. Düsseldorf: 2003.  
40  
41 404 [https://recht.nrw.de/lmi/owa/br\\_bes\\_detail?sg=0&menu=1&bes\\_id=5141&anw\\_nr=2&a](https://recht.nrw.de/lmi/owa/br_bes_detail?sg=0&menu=1&bes_id=5141&anw_nr=2&aufgehoben=N&det_id=401074)  
42  
43 405 [ufgehoben=N&det\\_id=401074](https://recht.nrw.de/lmi/owa/br_bes_detail?sg=0&menu=1&bes_id=5141&anw_nr=2&aufgehoben=N&det_id=401074)
- 44  
45 406 16 Landesbetrieb Information und Technik Nordrhein-Westfalen. *Empfängerinnen und*  
46  
47 407 *Empfänger von Asylbewerberleistungen in Nordrhein-Westfalen 2010 bis 2017*  
48  
49 408 *(unpublished).* Düsseldorf: 2018.



- 1  
2  
3 409 17 Ministerium für Arbeit Gesundheit und Soziales des Landes Nordrhein-Westfalen.  
4  
5  
6 410 Rahmenvereinbarung zur Übernahme der Gesundheitsversorgung für nicht  
7  
8 411 Versicherungspflichtige gegen Kostenerstattung nach § 264 Absatz 1 SGB V in Verbindung  
9  
10 412 mit §§ 1,1a Asylbewerberleistungsgesetz in Nordrhein-Westfalen.  
11  
12  
13 413 2015.[https://www.mags.nrw/sites/default/files/asset/document/rahmenvereinbarung\\_o](https://www.mags.nrw/sites/default/files/asset/document/rahmenvereinbarung_online.pdf)  
14  
15 414 nline.pdf (accessed 5 Apr 2018).  
16  
17  
18 415 18 Andersen RM. Revisiting the Behavioral Model and Access to Medical Care: Does it  
19  
20 416 Matter? *Am Sociol Assoc* 1995;**36**:1–10.  
21  
22  
23 417 19 Penchansky R, Thomas JW. The Concept of Access. Definition and Relationship to  
24  
25 418 Consumer Satisfaction. *Med Care* 1981;**19**:127–40.  
26  
27  
28 419 20 Bozorgmehr K, Schneider C, Joos S. Equity in access to health care among asylum seekers  
29  
30 420 in Germany: evidence from an exploratory population-based cross-sectional study. *BMC*  
31  
32 421 *Health Serv Res* 2015;**15**:502. doi:10.1186/s12913-015-1156-x  
33  
34  
35 422 21 Wenner J, Razum O, Schenk L, *et al.* Gesundheit von Kindern und Jugendlichen aus  
36  
37 423 Familien mit ungesichertem Aufenthaltsstatus im Vergleich zu Kindern mit und ohne  
38  
39 424 Migrationshintergrund: Auswertung der KiGGS-Daten 2003–06. *Bundesgesundheitsblatt -*  
40  
41 425 *Gesundheitsforsch - Gesundheitsschutz* 2016;**59**:627–35. doi:10.1007/s00103-016-2338-3  
42  
43  
44 426 22 Gee GC, Ro A, Shariff-Marco S, *et al.* Racial discrimination and health among asian  
45  
46 427 americans: Evidence, assessment, and directions for future research. *Epidemiol Rev*  
47  
48 428 2009;**31**:130–51. doi:10.1093/epirev/mxp009  
49  
50  
51 429 23 Zentrale Ethikkommission bei der Bundesärztekammer (ZEKO). Versorgung von nicht  
52  
53 430 regulär krankenversicherten Patienten mit Migrationshintergrund. *Dtsch Arztebl*

- 1  
2  
3 431 2013;**110**:A899-903.  
4  
5  
6 432 24 Agency for Healthcare Research and Quality. *AHRQ Quality Indicators. Guide to*  
7  
8 433 *prevention quality indicators: hospital admission for ambulatory care sensitive conditions.*  
9  
10 434 Rockville: : AHRQ Pub 2007. doi:10.1017/CBO9781107415324.004  
11  
12  
13 435 25 Faisst C, Sundmacher L. Ambulant-sensitive Krankenhausfälle: Eine internationale  
14  
15 436 Übersicht mit Schlussfolgerungen für einen deutschen Katalog. *Das Gesundheitswes*  
16  
17 437 2014;**77**:168–77. doi:10.1055/s-0034-1377033  
18  
19  
20 438 26 Ansari Z, Laditka JN, Laditka SB. Access to health care and hospitalization for ambulatory  
21  
22 439 care sensitive conditions. *Med Care Res Rev* 2006;**63**:719–41.  
23  
24 440 doi:10.1177/1077558706293637  
25  
26  
27 441 27 Basu J, Friedman B, Burstin H. Primary care, HMO enrollment, and hospitalization for  
28  
29 442 ambulatory care sensitive conditions: a new approach. *Med Care* 2002;**40**:1260–9.  
30  
31 443 doi:10.1097/01.MLR.0000036409.56436.ED  
32  
33  
34 444 28 Rosano A, Loha CA, Falvo R, *et al.* The relationship between avoidable hospitalization and  
35  
36 445 accessibility to primary care: A systematic review. *Eur J Public Health* 2013;**23**:356–60.  
37  
38 446 doi:10.1093/eurpub/cks053  
39  
40  
41 447 29 Lichtl C, Gewalt SC, Noest S, *et al.* Potentially avoidable and ambulatory care sensitive  
42  
43 448 hospitalisations among forced migrants: a protocol for a systematic review and meta-  
44  
45 449 analysis. *BMJ Open* 2016;**6**:e012216. doi:10.1136/bmjopen-2016-012216  
46  
47  
48 450 30 Lichtl C, Lutz T, Szecsenyi J, *et al.* Differences in the prevalence of hospitalizations and  
49  
50 451 utilization of emergency outpatient services for ambulatory care sensitive conditions  
51  
52 452 between asylum-seeking children and children of the general population: A cross-  
53  
54  
55  
56  
57  
58  
59  
60

- 1  
2  
3 453 sectional medical records study. *BMC Health Serv Res* 2017;**17**:1–9. doi:10.1186/s12913-  
4  
5  
6 454 017-2672-7  
7  
8 455 31 Sundmacher L, Fischbach D, Schuettig W, *et al*. Which hospitalisations are ambulatory  
9  
10 456 care-sensitive, to what degree, and how could the rates be reduced? Results of a group  
11  
12 457 consensus study in Germany. *Health Policy (New York)* 2015;**119**:1415–23.  
13  
14 458 doi:10.1016/j.healthpol.2015.08.007  
15  
16  
17 459 32 Sundmacher L, Schüttig W, Faisst C. Ein konsentierter deutscher Katalog ambulant-  
18  
19 460 sensitiver Diagnosen. *Versorgungsatlas* 2015;**18**.  
20  
21 461 33 Crawley LM, Ahn DK, Winkleby MA. Perceived Medical Discrimination and Cancer  
22  
23 462 Screening Behaviors of Racial and Ethnic Minority Adults. *Cancer Epidemiol Biomarkers*  
24  
25 463 *Prev* 2008;**17**:1937–44. doi:10.1158/1055-9965.EPI-08-0005  
26  
27  
28 464 34 Trivedi AN, Ayanian JZ. Perceived discrimination and use of preventive health services. *J*  
29  
30 465 *Gen Intern Med* 2006;**21**:553–8. doi:10.1111/j.1525-1497.2006.00413.x  
31  
32  
33 466 35 Classen G. Rechtsprechungsübersicht zum Flüchtlingssozialrecht (seit 1993).  
34  
35 467 2015.<http://www.fluechtlingsinfo-berlin.de/fr/gesetzgebung/Urteile2.pdf> (accessed 10  
36  
37 468 Aug 2018).  
38  
39  
40 469 36 Ministerium für Arbeit Gesundheit und Soziales des Landes Nordrhein-Westfalen.  
41  
42 470 Rahmenvereinbarung zur Übernahme der Gesundheitsversorgung für nicht  
43  
44 471 Versicherungspflichtige gegen Kostenerstattung nach § 264 Absatz 1 SGB V in Verbindung  
45  
46 472 mit §§ 1,1a Asylbewerberleistungsgesetz in Nordrhein-Westfalen. Anlage 1.  
47  
48 473 2015.[https://www.mags.nrw/sites/default/files/asset/document/leistungsumfang\\_anlag](https://www.mags.nrw/sites/default/files/asset/document/leistungsumfang_anlag)  
49  
50 474 e1\_online.pdf (accessed 5 Apr 2018).  
51  
52  
53  
54  
55  
56  
57  
58  
59  
60

- 1  
2  
3 475 37 Classen G. *Sozialleistungen für MigrantInnen und Flüchtlinge*. Karlsruhe: : Loeper  
4  
5  
6 476 Literatur, Pro Asyl 2008.  
7  
8 477 38 Janssen C, Swart E, v. Lemgerke T. *Health Care Utilization in Germany. Theory,*  
9  
10 478 *Methodology, and Results*. New York: : Springer New York 2014.  
11  
12  
13 479 39 Razum O, Bunte A, Gilsdorf A, *et al*. Zu gesicherten Daten kommen. *Dtsch Arztebl*  
14  
15 480 2016;**113**:130–3.  
16  
17  
18 481 40 Bozorgmehr K, Goosen S, Mohsenpour A, *et al*. How do countries' health information  
19  
20 482 systems perform in assessing asylum seekers' health situation? Developing a health  
21  
22 483 information assessment tool on asylum seekers (HIATUS) and piloting it in two European  
23  
24 484 Countries. *Int J Environ Res Public Health* 2017;**14**. doi:10.3390/ijerph14080894  
25  
26  
27 485 41 Gavranidou M, Niemiec B, Magg B, *et al*. Traumatische Erfahrungen, aktuelle  
28  
29 486 Lebensbedingungen im Exil und psychische Belastung junger Flüchtlinge. *Kindheit und*  
30  
31 487 *Entwicklung* 2008;**17**:224–31. doi:10.1026/0942-5403.17.4.224  
32  
33  
34 488 42 Schenk L, Ellert U, Neuhauser H. Kinder und Jugendliche mit Migrationshintergrund in  
35  
36 489 Deutschland: Methodische Aspekte im Kinder- und Jugendgesundheitsurvey (KiGGS).  
37  
38 490 *Bundesgesundheitsblatt - Gesundheitsforsch - Gesundheitsschutz* 2007;**50**:590–9.  
39  
40 491 doi:10.1007/s00103-007-0220-z  
41  
42  
43 492 43 Schulz M, Schulz M, Bätzing-Feigenbaum J, *et al*. Vertragsärzte und -psychotherapeuten  
44  
45 493 je 100.000 Einwohner nach Bedarfsplanungsfachgebieten und -regionen im Jahr 2013. In:  
46  
47 494 *Versorgungsatlas-Bericht Nr. 15/02*. Berlin: : Zentralinstitut für die kassenärztliche  
48  
49 495 Versorgung in Deutschland 2015.  
50  
51  
52 496 44 Sundmacher L, Busse R. Der Einfluss der Ärztedichte auf ambulant-sensitive  
53  
54  
55  
56  
57  
58  
59  
60

- 1  
2  
3 497 Krankenhausfälle. In: Klauber J, Geraedts M, Friedrich J, *et al.*, eds. *Krankenhaus-Report*  
4  
5  
6 498 2012. Stuttgart: : Schattauer-Verlag 2012. 183–202.  
7  
8 499 45 Bertelsmann Stiftung. Wegweiser Kommune. 2018.<https://www.wegweiser->  
9  
10 500 [kommune.de/impressum](https://www.wegweiser-kommune.de/impressum) (accessed 6 Apr 2018).  
11  
12  
13 501 46 Landeswahlleiter des Landes NRW. Wahlergebnisse in NRW. Kommunalwahlen 2014.  
14  
15 502 2014.<https://www.wahlergebnisse.nrw.de/kommunalwahlen/2014/index.html> (accessed  
16  
17 503 5 Apr 2018).  
18  
19  
20 504

## 505 **List of Abbreviations**

- 25 506 ACSC Ambulatory care sensitive conditions  
26  
27  
28 507 ACSH Ambulatory care sensitive hospitalizations  
29  
30  
31 508  
32  
33 509 AsylbLG Asylbewerberleistungsgesetz/Asylum Seeker's Benefits Act  
34  
35  
36 510 eHC Electronic health card model  
37  
38 511 HcV Health care voucher model  
39  
40  
41 512 NRW Nordrhein-Westfalen/North Rhine-Westphalia  
42

43 513  
44  
45  
46  
47  
48  
49  
50  
51  
52  
53  
54  
55  
56  
57  
58  
59  
60

1  
2  
3 515 **Acknowledgements**  
4  
5

6  
7 516 **Data sharing**  
8  
9

10 517 Data collection is still ongoing. Details of the data sharing will be agreed upon once the data collection  
11  
12 518 has been completed.  
13  
14

15 519 **Ethics approval and consent to participate**  
16  
17

18 520 The study has been positively reviewed by the Ethics Committee and the data protection officer  
19  
20  
21 521 of Bielefeld University.  
22  
23

24 522 Application Number: 2017-099  
25  
26

27 523 Date: 10<sup>th</sup> May 2017  
28  
29

30  
31 524 Consent was not obtained because the patient cannot be traced. However, there was no need  
32  
33 525 to obtain consent, because data is fully anonymized.  
34  
35

36 526 **Competing interests**  
37  
38

39  
40 527 The authors declare that they have no competing interests.  
41  
42

43 528 **Funding**  
44  
45

46 529 The work was supported by the Ministry of Culture and Research of the Federal State of North  
47  
48  
49 530 Rhine-Westphalia (grant number 1704i010).  
50  
51

52 531 We acknowledge the financial support of the German Research Foundation (DFG) and the Open  
53  
54  
55 532 Access Publication Fund of Bielefeld University for the article processing charge.  
56  
57  
58  
59  
60

1  
2  
3 533 **Authors' contributions**  
4  
5

6 534 JW, KR und OR designed the study. JB, OS und KB made substantial contributions to its  
7  
8 535 conception and design. JW drafted the manuscript. KR, JB, OS, KB und OR revisited the  
9  
10 536 manuscript critically for important intellectual content. All authors read and approved the final  
11  
12  
13 537 manuscript.  
14  
15

16  
17 538 **Acknowledgements**  
18  
19

20 539 Not applicable  
21  
22  
23  
24 540  
25  
26  
27  
28  
29  
30  
31  
32  
33  
34  
35  
36  
37  
38  
39  
40  
41  
42  
43  
44  
45  
46  
47  
48  
49  
50  
51  
52  
53  
54  
55  
56  
57  
58  
59  
60

1  
2  
3  
4  
5  
6  
7  
8  
9  
10  
11  
12  
13  
14  
15  
16  
17  
18  
19  
20  
21  
22  
23  
24  
25  
26  
27  
28  
29  
30  
31  
32  
33  
34  
35  
36  
37  
38  
39  
40  
41  
42  
43  
44  
45  
46  
47  
48  
49  
50  
51  
52  
53  
54  
55  
56  
57  
58  
59  
60

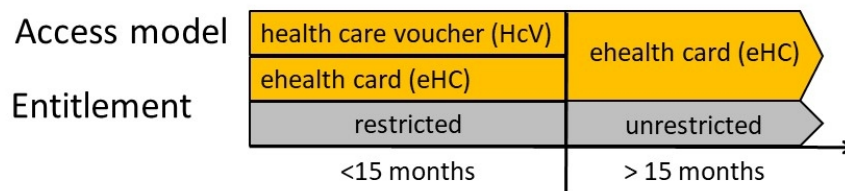

Figure 1: Health care for newly arrived refugees in Germany: simplified access model and entitlement in municipalities (own illustration)

254x190mm (96 x 96 DPI)



1  
2  
3  
4  
5  
6  
7  
8  
9  
10  
11  
12  
13  
14  
15  
16  
17  
18  
19  
20  
21  
22  
23  
24  
25  
26  
27  
28  
29  
30  
31  
32  
33  
34  
35  
36  
37  
38  
39  
40  
41  
42  
43  
44  
45  
46  
47  
48  
49  
50  
51  
52  
53  
54  
55  
56  
57  
58  
59  
60

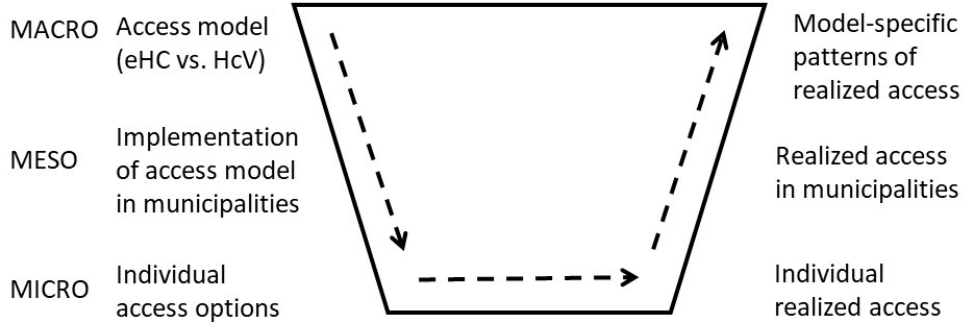

Figure 2: Graphical summary of the overall study hypothesis (own illustration based on,[14] p. 10)  
254x190mm (96 x 96 DPI)

# BMJ Open

## Inequalities in realized access to health care among recently arrived refugees depending on local access model: study protocol for a quasi-experimental study

|                                 |                                                                                                                                                                                                                                                                                                                                                                                                                                                                                                                                                                                                                                                                                                                                                               |
|---------------------------------|---------------------------------------------------------------------------------------------------------------------------------------------------------------------------------------------------------------------------------------------------------------------------------------------------------------------------------------------------------------------------------------------------------------------------------------------------------------------------------------------------------------------------------------------------------------------------------------------------------------------------------------------------------------------------------------------------------------------------------------------------------------|
| Journal:                        | <i>BMJ Open</i>                                                                                                                                                                                                                                                                                                                                                                                                                                                                                                                                                                                                                                                                                                                                               |
| Manuscript ID                   | bmjopen-2018-027357.R1                                                                                                                                                                                                                                                                                                                                                                                                                                                                                                                                                                                                                                                                                                                                        |
| Article Type:                   | Protocol                                                                                                                                                                                                                                                                                                                                                                                                                                                                                                                                                                                                                                                                                                                                                      |
| Date Submitted by the Author:   | 04-Mar-2019                                                                                                                                                                                                                                                                                                                                                                                                                                                                                                                                                                                                                                                                                                                                                   |
| Complete List of Authors:       | Wenner, Judith; Bielefeld School of Public Health, Dept. of Epidemiology & International Public Health<br>Rolke, Kristin; Bielefeld School of Public Health, Dept. of Epidemiology & International Public Health<br>Breckenkamp, Jürgen; Bielefeld School of Public Health, Dept. of Epidemiology & International Public Health<br>Sauzet, Odile; Bielefeld School of Public Health, Dept. of Epidemiology & International Public Health<br>Bozorgmehr, Kayvan; University Hospital Heidelberg, Dept. of General Practice and Health Services Research; Bielefeld School of Public Health, Dept. of Population Medicine and Health Services Research<br>Razum, Oliver; Bielefeld School of Public Health, Dept. of Epidemiology & International Public Health |
| <b>Primary Subject Heading</b>: | Public health                                                                                                                                                                                                                                                                                                                                                                                                                                                                                                                                                                                                                                                                                                                                                 |
| Secondary Subject Heading:      | Health services research                                                                                                                                                                                                                                                                                                                                                                                                                                                                                                                                                                                                                                                                                                                                      |
| Keywords:                       | refugee health, access to health care, quasi-experimental design, Health policy < HEALTH SERVICES ADMINISTRATION & MANAGEMENT, Organisation of health services < HEALTH SERVICES ADMINISTRATION & MANAGEMENT, PUBLIC HEALTH                                                                                                                                                                                                                                                                                                                                                                                                                                                                                                                                   |
|                                 |                                                                                                                                                                                                                                                                                                                                                                                                                                                                                                                                                                                                                                                                                                                                                               |

SCHOLARONE™  
Manuscripts

1  
2  
3 1 **Title Page**  
4

5  
6  
7 2 **Inequalities in realized access to health care among recently arrived refugees**  
8  
9  
10 3 **depending on local access model: study protocol for a quasi-experimental**  
11  
12 4 **study**  
13  
14  
15

16 5 Judith Wenner (Corresponding Author), M.Sc., Dept. of Epidemiology & International Public  
17  
18 6 Health, School of Public Health, Bielefeld University, P.O. Box 10 01 31, 33501 Bielefeld,  
19  
20  
21 7 Germany, [Judith.wenner@uni-bielefeld.de](mailto:Judith.wenner@uni-bielefeld.de)  
22  
23  
24 8

25  
26 9 Kristin Rolke, M.Sc., Dept. of Epidemiology & International Public Health, School of Public  
27  
28 10 Health, Bielefeld University, P.O. Box 10 01 31, 33501 Bielefeld, Germany, [kristin.rolke@uni-](mailto:kristin.rolke@uni-)  
29  
30  
31 11 [bielefeld.de](mailto:kristin.rolke@uni-bielefeld.de)  
32  
33  
34 12

35  
36 13 Dr. Jürgen Breckenkamp, Dept. of Epidemiology & International Public Health, School of  
37  
38 14 Public Health, Bielefeld University, P.O. Box 10 01 31, 33501 Bielefeld, Germany,  
39  
40  
41 15 [juergen.breckenkamp@uni-bielefeld.de](mailto:juergen.breckenkamp@uni-bielefeld.de)  
42  
43  
44 16

45  
46 17 Dr. Odile Sauzet, Dept. of Epidemiology & International Public Health, School of Public  
47  
48 18 Health, Bielefeld University, P.O. Box 10 01 31, 33501 Bielefeld, Germany, [odile.sauzet@uni-](mailto:odile.sauzet@uni-)  
49  
50  
51 19 [bielefeld.de](mailto:odile.sauzet@uni-bielefeld.de)  
52  
53  
54 20

55  
56 21 Prof. Dr. Kayvan Bozorgmehr, MD, M.Sc., Dept. of General Practice and Health Services  
57  
58 22 Research, University Hospital Heidelberg, Marsilius-Arkaden Turm West, Im Neuenheimer  
59  
60 23 Feld 130.3

1  
2  
3 24 69120 Heidelberg, Germany, [kayvan.bozorgmehr@med.uni-heidelberg.de](mailto:kayvan.bozorgmehr@med.uni-heidelberg.de) and Department  
4  
5 25 [of Population Medicine and Health Services Research, School of Public Health, Bielefeld](#)  
6  
7  
8 26 [University, Bielefeld, Germany](#)  
9

10  
11 27  
12  
13 28 Prof. Dr. Oliver Razum, MD, M.Sc., Dept. of Epidemiology & International Public Health,  
14  
15 29 School of Public Health, Bielefeld University, P.O. Box 10 01 31, 33501 Bielefeld, Germany,  
16  
17 30 [oliver.razum@uni-bielefeld.de](mailto:oliver.razum@uni-bielefeld.de)  
18  
19  
20  
21 31

22  
23 32 **Word count of main text: 4442**  
24

### 25 26 27 33 **Abstract** 28

29  
30  
31 34 Introduction: In many countries, including Germany, newly arriving refugees face specific  
32  
33 35 entitlement restrictions and access barriers to health care. While entitlement restrictions  
34  
35 36 apply to all refugees that seek protection in Germany during the first months, the barriers to  
36  
37 37 access depend on the model that the states and the municipalities implement locally.  
38  
39 38 Currently, two different models exist: the health care voucher model (HcV) and the electronic  
40  
41 39 health card model (eHC). The aim of the study is to analyse the consequences of these two  
42  
43 40 different access models on newly arrived refugees' realized access to health care.  
44  
45  
46  
47

48  
49 41 Methods and analysis: The random assignment of refugees to municipalities allows for a quasi-  
50  
51 42 experimental design by comparing realized access to health care among refugees in six  
52  
53 43 municipalities in North Rhine-Westphalia (NRW) which have implemented HcV or eHC. We  
54  
55 44 compare realized access to health care using ambulatory care sensitive conditions and health  
56  
57 45 expenditure as outcome indicators; and use of emergency care, preventive care,  
58  
59  
60

1  
2  
3 46 psychotherapeutic or psychiatric care, and of therapeutic devices, as process indicators.  
4  
5  
6 47 Results will be adjusted for aggregated information on age, sex, socioeconomic structure of  
7  
8 48 the municipalities, and density of general practitioners or specialists.  
9

10  
11 49 Ethics and dissemination: We cooperated with local welfare offices and the statutory health  
12  
13 50 insurance for data collection. Thereby, we were able to avoid recruiting large numbers of  
14  
15 51 refugee patients immediately after arrival while their access and entitlement to health care is  
16  
17 52 restricted. We developed an extensive data protection concept and ensured that all data  
18  
19 53 collected is fully anonymized. Results will be published in peer-reviewed journals and  
20  
21 54 summarized in reports to the funding agency.  
22  
23  
24  
25  
26  
27  
28  
29

### 30 56 **Strengths and limitations of this study**

- 31  
32  
33 57 • Our study comprises a large and diverse sample of refugees during the period of  
34  
35 58 restricted entitlements that are usually excluded from health system research and  
36  
37 59 official health reporting.  
38  
39  
40  
41 60 • Refugees are randomly assigned to different municipalities which allows for a quasi-  
42  
43 61 experimental research design.  
44  
45  
46 62 • Due to selection bias we might underestimate the effect size as municipalities with  
47  
48 63 restrictive refugee health policies are less likely to participate.  
49  
50  
51 64 • Demographic information is not collected on the individual, but on the municipality  
52  
53 65 level.  
54  
55  
56  
57  
58  
59  
60

### 67 **Key Words**

1  
2  
3 68 Refugee health, access to health care, quasi-experimental design, health policy, organization  
4  
5  
6 69 of health services, public health  
7  
8  
9  
10  
11  
12  
13  
14  
15  
16  
17  
18  
19  
20  
21  
22  
23  
24  
25  
26  
27  
28  
29  
30  
31  
32  
33  
34  
35  
36  
37  
38  
39  
40  
41  
42  
43  
44  
45  
46  
47  
48  
49  
50  
51  
52  
53  
54  
55  
56  
57  
58  
59  
60

For peer review only

1  
2  
3 70 **MAIN TEXT**  
4  
5

6  
7 71 **INTRODUCTION**  
8  
9

10 72 In many countries, newly arriving refugees face specific entitlement restrictions and access  
11  
12 73 barriers to health care.[1,2] The underlying regulations have been discussed from ethical,  
13  
14 74 human rights and legal perspectives.[3–5] While we acknowledge the importance of these  
15  
16 75 fundamental debates, our study focuses on the actual consequences of these regulations for  
17  
18 76 the use of health care among recently arrived refugees. We concentrate on the regulations  
19  
20 77 that apply to refugees during their first years after arrival as we consider this time to be a  
21  
22 78 socially critical period (as defined by Bartley et al. [6]), and as such as decisive for the  
23  
24 79 individual's further life course and the development of social and health inequalities.  
25  
26  
27  
28  
29

30  
31 80 In the first 15 months after arrival, entitlement to health care is restricted and formal access  
32  
33 81 is not equal to that of persons covered via the statutory health insurance. Entitlement is  
34  
35 82 restricted by article 4 and 6 of the Asylum Seekers' Benefits Act (AsylbLG). The AsylbLG covers  
36  
37 83 the cost of health care provision in case of acute illness and pain, pregnancy and birth, as well  
38  
39 84 as for officially recommended vaccination and medically necessary check-ups. Other services,  
40  
41 85 for example diagnoses and treatment of non-acute chronic illness or (long-term)  
42  
43 86 psychotherapy, are only granted on a case-by-case basis.[7] Among persons facing these  
44  
45 87 restrictions, hospitalizations and emergency care use is increased while numbers of  
46  
47 88 prescriptions and dental visits are decreased compared to persons insured via the standard  
48  
49 89 statutory health insurance, showing that these legal regulations actually shape patterns of  
50  
51 90 health care use.[8]  
52  
53  
54  
55  
56  
57  
58  
59  
60

1  
2  
3 91 Besides these entitlement restrictions that apply to all newly arrived refugees – with the  
4  
5 92 exception of unaccompanied minors – the bureaucratic procedures required before health  
6  
7 93 care services can be accessed have been identified as barriers to necessary care.[9] Given that  
8  
9  
10 94 these procedures differ between municipalities and federal states, the actual access also  
11  
12  
13 95 differs. Basically, two different access models exist: the electronic health card model (eHC)  
14  
15 96 and the health care voucher mode (HcV) (Fig. 1). The eHC model provides access comparable  
16  
17  
18 97 to that of patients in the statutory health insurance. Refugees receive e-health cards once they  
19  
20 98 are assigned to a municipality. They can directly access health care services presenting the  
21  
22  
23 99 card at the hospital or in a doctor's office, but the entitlement restrictions largely remain. The  
24  
25 100 HcV model constitutes a parallel access model specifically for refugees during the first 15  
26  
27  
28 101 months. In municipalities using the HcV model, refugees need to apply for health care  
29  
30 102 vouchers at the local welfare authorities before accessing care. These health care vouchers  
31  
32  
33 103 are valid usually for three months.[9–11]

34  
35  
36 104 After 15 months, all refugees receive e-health cards and join a statutory health insurance. The  
37  
38 105 restrictions of articles 4 and 6 no longer apply (Fig. 1). If their asylum claims have been  
39  
40 106 approved or they find employment, this happens even earlier. In some cases (e.g. when  
41  
42  
43 107 persons have not revealed their identities), the restrictions are extended (Article 2 AsylbLG).

44  
45  
46 108 [Fig 1]

47  
48  
49 109 **Figure 1: Health care for newly arrived refugees in Germany: simplified access model and**  
50  
51  
52 110 **entitlement in municipalities** (own illustration)

53  
54 111  
55  
56 112 Each of the 16 federal states in Germany decides on the access model to be implemented. An  
57  
58  
59 113 exception is the state government in North-Rhine Westphalia (NRW), which left it to the  
60



1  
2  
3 114 municipalities to either opt for the HcV or the eHC model. NRW is the only federal state in  
4  
5  
6 115 which both models are concurrently in use in a considerable number of municipalities.  
7  
8 116 Refugees in NRW are randomly assigned to municipalities – and thereby to the different access  
9  
10 117 models – after leaving the initial reception centers. Assignment of refugees takes place  
11  
12  
13 118 according to the population size and area size of the municipalities without prior consideration  
14  
15 119 of assumed health care needs of the refugees. Members of one family (parents and children)  
16  
17  
18 120 are assigned to the same municipality. Exceptional circumstances – including psycho-medical  
19  
20 121 needs – might later lead to reassignment (e.g. if treatment is only possible in a certain  
21  
22  
23 122 municipality).[12]

24  
25  
26 123 We hypothesize that the choice of the model affects access to health care, utilization, and  
27  
28 124 health care expenditures. So far, this has not been studied. However, available research  
29  
30  
31 125 results suggest that the HcV model constitutes a barrier to ambulatory health care,[9] leads  
32  
33 126 to higher health care expenses, [13] and might explain – at least partly – the increased use of  
34  
35  
36 127 emergency care among refugees, and the lower utilization of outpatient health care  
37  
38 128 services.[14] This leads to the overall study hypothesis: The access model (macro level) and its  
39  
40  
41 129 implementation (meso level) influence the access to health care for refugees living in the  
42  
43 130 respective municipalities (micro level). As a consequence, we expect to observe different  
44  
45  
46 131 patterns of realized access on municipality level (meso level) and between access models  
47  
48 132 (macro level) (c.f. Fig. 2, based on [15], p. 10).

49  
50  
51 133 [Fig. 2]

52  
53  
54 134 **Figure 2: Overall study hypothesis** (own illustration)

55  
56 135

## 57 58 136 **METHODS AND ANALYSIS**

### 137 **Design, setting, participants and sample size**

138 We here define refugees as all persons who recently migrated to Germany seeking legal  
139 protection – irrespective of their legal status and the reasons for seeking protection. Refugees  
140 are randomly assigned to municipalities. As municipalities have implemented different access  
141 models (eHC or HcV), a quasi-experimental study design can be realized.

142 At the end of 2016, 191,312 refugees lived in municipalities in NRW and were entitled to  
143 health care services according to articles 4 and 6 AsylbLG. Of these, 21.6% (41,348) lived in  
144 one of the 20 municipalities using the eHC model at that time. In 2017, of the 122,405 recently  
145 arrived refugees, 23.3% lived in one of the meanwhile 24 municipalities using the eHC  
146 model.[16]

147 We calculated the sample size based on the primary outcome (ambulatory care sensitive  
148 conditions, ACSC). In a similar study, incidence rate of ACSC was 38 per 1000 among refugees  
149 living in municipalities with eHC.[8] We found no study investigating the ACSC of refugees  
150 living in municipalities with HcV. Based on results from reports and qualitative studies, we  
151 estimated an incidence rate of 50 per 1000. With a predefined power of 0.8 and a significance  
152 level of 0.05 we calculated a sample size of 4750 per group. We decided to include one larger  
153 city, one medium size city and one smaller city for each group in order to meet the necessary  
154 sample size and reflect possible differences between settings. In total, we thus recruited six  
155 municipalities. In these municipalities, all newly arrived refugees entitled to health care  
156 through the local welfare offices are going to be included in the study.

157 As the number of municipalities with eHC is comparatively small (22 with eHC compared to  
158 374 with HcV), recruitment started among the 22 eHC-municipalities. Recruitment was  
159 realized through the statutory health insurance companies. The municipalities differ in

1  
2  
3 160 population size and organizational structure (independent city or district-affiliated city).  
4  
5  
6 161 Subsequently, we applied purposive sampling to recruit municipalities using the HcV model,  
7  
8 162 considering their population size and organizational structure. As we were able to include all  
9  
10 163 refugees entitled to services during the study period, no further sampling was necessary.

11  
12  
13  
14 164 Data collection started in June 2018 and will last until beginning of 2019. Data has to be  
15  
16 165 collected retrospectively, as health care providers need several months for controlling and  
17  
18 166 billing. Ultimately, we will include data on health care use for seven subsequent quarters (2-  
19  
20  
21 167 2016 until 4-2017).

#### 22 23 24 168 **Variables and data sources**

25  
26  
27 169 For municipalities using the HcV model, refugees' demographic data and data on use of health  
28  
29 170 care services has to be collected directly at the local welfare office or from the external service  
30  
31 171 providers in case the municipalities have outsourced the verification and payment of invoices.  
32  
33  
34 172 In municipalities which have implemented the eHC model, data has to be collected from the  
35  
36  
37 173 responsible statutory health insurance.[17]

38  
39  
40 174 Data includes principle and secondary diagnoses (ICD-10-Codes), type of care used (primary,  
41  
42 175 specialist, emergency or hospital care), procedures and prescriptions and date of use  
43  
44 176 (quarterly). Quarterly data on number of refugees according to age and sex is provided by the  
45  
46  
47 177 health insurances or the welfare offices. It is available as aggregated information only.  
48  
49  
50 178 Similarly, health care expenditure is available as aggregated variable only.

#### 51 52 53 179 *Outcomes: realized access*

54  
55  
56  
57 180 The primary outcome we are interested in is realized access to health care. The only available  
58  
59 181 data that might serve as an indicator of access to health care are use of health care services  
60

1  
2  
3 182 and related expenditures. Given that expenditures are the direct consequence of use and thus  
4  
5  
6 183 primarily determined by use, we focus here on the relationship between access and use. In  
7  
8 184 line with the “Behavioral Model of Health Service Use” developed and updated by Ronald M  
9  
10 185 Anderson, we consider use to be equal to realized access and thereby a suitable proxy for  
11  
12  
13 186 access.[18] The available claims data does not allow for analysis of more complex concepts of  
14  
15 187 access – e.g. as the fit between the individuals’ and the systems’ characteristics.[19] Use and  
16  
17  
18 188 expenditure are generalized measures that need hypothesis-based concretization. We  
19  
20 189 developed three sub-hypotheses on the effects of the HcV model on use and thereby also on  
21  
22  
23 190 local health care expenditure, assuming that the hypothesized effects are absent in  
24  
25 191 municipalities using the eHC model. All three hypotheses thus refer to differences in use and  
26  
27  
28 192 expenditure between refugees in municipalities using health vouchers (exposed) and refugees  
29  
30 193 in municipalities issuing e-health cards (unexposed). For each sub-hypothesis, we  
31  
32  
33 194 operationalized suitable outcome measures.

### 35 195 1) Emergency care

37  
38  
39 196 Health care vouchers are said to complicate access to care – especially to primary or  
40  
41 197 specialized ambulatory care.[14] The vouchers are valid only for three months, they are not  
42  
43  
44 198 always known to the health professionals, and they immediately show that a person has no  
45  
46 199 full entitlement to health care. Patients might delay, or refrain from, using ambulatory services  
47  
48  
49 200 to avoid applying for and showing the vouchers. There is no need to present the health care  
50  
51 201 voucher for emergency care.[9,20–23] As a consequence, we assume a higher use of  
52  
53  
54 202 emergency care services. We will calculate incidence rates of emergency cases (=outcome 1)  
55  
56 203 and relative risks for each quarter. If the emergency case led to hospitalization, only the date  
57  
58  
59 204 of admission will be considered. We count emergency cases (even if a person uses emergency  
60  
205 services several times per quarter) and relate the cases to the number of persons eligible to

1  
2  
3 206 services according to AsylbLG Article 4 and 6. We will also count the number of individuals  
4  
5  
6 207 that have used emergency services at least once in the quarter. For individual level regression  
7  
8 208 analysis, a dichotomous outcome variable will be coded containing the information whether  
9  
10 209 or not an individual had used emergency care in the quarter. For ecological regression analysis,  
11  
12  
13 210 quarterly incidence of emergency cases in the six municipalities will serve as outcome variable.  
14  
15

## 16 211 2) Delayed treatment

17  
18  
19 212 The additional effort needed to access care in municipalities with HcV model might also lead  
20  
21  
22 213 to delays in treatment. Instead of accessing primary care, patients might delay treatment until  
23  
24 214 hospitalization is necessary. Hospitalizations that could have been avoided with adequate  
25  
26  
27 215 outpatient care are defined as ambulatory care sensitive hospitalizations (ACSH). Usually,  
28  
29 216 ACSH are identified based on the related diagnoses. Accordingly, ambulatory care sensitive  
30  
31 217 conditions (ACSC) are thus defined as “conditions for which good outpatient care can  
32  
33  
34 218 potentially prevent the need for hospitalization, or for which early intervention can prevent  
35  
36 219 complications or more severe disease”[24, p.1]. ASCH are considered to be a valid indicator of  
37  
38  
39 220 access barriers to ambulatory care in general [25–28] and have also been identified as a useful  
40  
41 221 indicator of access to primary ambulatory care among forced migrants.[8,29,30] Several  
42  
43  
44 222 different catalogues of ACSC have been developed internationally. Recently, they have been  
45  
46 223 adapted and validated for the German context.[31] The full list of ACSC comprises 40 diagnosis  
47  
48  
49 224 groups, with 22 being considered as core diagnosis groups. The full list compiled by  
50  
51 225 Sundmacher et al. includes 258 ambulatory sensitive ICD-10 codes.[32] For children, we use a  
52  
53  
54 226 slightly modified list developed by Lichtl et al.[30] Based on this lists, we define ambulatory  
55  
56 227 care sensitive cases (=outcome 2) and calculate incidence rates per quarter in municipalities  
57  
58 228 using the HcV model and the eHC model (with N being all refugees entitled to services in the  
59  
60 229 quarter). We will compare incidence rates over time and between municipalities. We will also

1  
2  
3 230 calculate relative risk comparing the incidence between models. Again, we will calculate  
4  
5  
6 231 incidence rates (counting all cases even if one person has several ACSC diagnosed) and in  
7  
8 232 addition the share of individuals with at least one ASCS per quarter. As described for outcome  
9  
10 233 1, we will use a dichotomous outcome variable and the quarterly incidence as outcomes for  
11  
12 234 regression analysis. If the number of cases allows, we will further differentiate between ACSC  
13  
14  
15 235 cases with regular referral and emergency ACSC cases where the patients have been  
16  
17  
18 236 hospitalized after visiting or being brought to the emergency department.

### 21 237 3) Non-urgency of treatment

23  
24 238 The delay in treatment and the increase in emergency care use or hospitalizations might not  
25  
26  
27 239 materialize during the observation period (first 15 months of stay in Germany) as assumed in  
28  
29 240 hypothesis 1 and 2 (above). It may materialize only afterwards, once the entitlement  
30  
31 241 restrictions cease to apply and e-health cards are issued for all. During the observation period,  
32  
33  
34 242 this would still result in a lower use of outpatient cases (primary care) among refugees living  
35  
36 243 in municipalities with a health care voucher – especially for deferrable services such as check-  
37  
38  
39 244 ups or prevention.[14] The participation in medically necessary check-ups (Z- codes according  
40  
41 245 to ICD-10-GM) has been used as outcome measure for access barriers and discrimination  
42  
43  
44 246 related to minority or migration status.[22,33,34] However, the use of preventive care  
45  
46 247 (=outcome 3) as outcome is conditioned on the size of the population groups entitled to  
47  
48  
49 248 preventive services (pregnant women, children, elderly) in the available data and the quality  
50  
51 249 of information on age and sex. If information on age and sex is not detailed enough, we will  
52  
53  
54 250 only include the incidence of persons using outpatient care among all people entitled to care  
55  
56 251 in the quarter – also differentiating between ambulatory and specialized care.

1  
2  
3 252 In addition to postponing preventive care (which should be guaranteed according to article 4  
4  
5 253 AsylbLG in all municipalities), municipalities using the HcV model might refuse to refund  
6  
7  
8 254 services as part of the case-by-case review (Art. 6 AsylbLG) referring to the non-urgency of the  
9  
10 255 treatment (*Kriterium der Aufschiebbarkeit*). The framework agreement on the e-health card  
11  
12  
13 256 abolishes any consideration of non-urgency of treatment. Thus, in municipalities using the e-  
14  
15 257 health cards, most services are granted irrespective of their urgency. However, in  
16  
17  
18 258 municipalities using the HcV model, urgency of treatment might still be considered.  
19  
20 259 Psychotherapy and therapeutic devices (“Hilfsmittel”) have been identified as services for  
21  
22  
23 260 which the consideration of urgency might lead to differences in realized access.[3,35–37] We  
24  
25 261 will thus compare psychotherapeutic care cases (outcome 4) and refunded therapeutic  
26  
27  
28 262 devices (outcome 5) between access models. Cases of psychotherapeutic care are defined as  
29  
30 263 visits to specialized doctors (psychiatrists and psychological psychotherapists) and not based  
31  
32  
33 264 on diagnoses. For psychotherapeutic care, repeated visits by the same person in the same  
34  
35 265 quarter will not be counted separately. For therapeutic devices, prescriptions for the same  
36  
37  
38 266 device for the same person in the same quarter will not be counted separately. Incidence rates  
39  
40 267 and relative risk will be calculated for each quarter comparing risks between models and over  
41  
42 268 time.

#### 45 269 *Outcomes: expenditures*

46  
47  
48  
49 270 So far, we only referred to the ACSC as outcome indicator and several process indicators related  
50  
51 271 to health care use. However, data on health care expenditure is available (excluding  
52  
53  
54 272 administrative costs). This allows us to relate our indicators of use to the related health care  
55  
56 273 expenditure in the municipalities. We assume the following consequences for per capita  
57  
58 274 expenditure:

1  
2  
3 275 1) Expenditures on emergency care  
4  
5

6 276 In line with the hypothesis on *emergency care*, the HcV access model is associated with higher  
7  
8  
9 277 use of emergency care and thereby leads to higher health care expenditures for emergency  
10  
11 278 care per capita (per quarter) in municipalities using the HcV model compared to municipalities  
12  
13  
14 279 with eHC model.  
15  
16

17 280 2) Expenditures related to delayed treatment  
18  
19

20 281 In line with the hypothesis on *delayed treatment*, the HcV access model is associated with  
21  
22  
23 282 higher risk for ambulatory care sensitive hospitalizations. We therefore assume higher health  
24  
25 283 care expenditures for inpatient care per capita (per quarter) in municipalities using the HcV  
26  
27  
28 284 model compared to municipalities with eHC model.  
29  
30

31 285 3) Expenditures related to the non-urgency of treatment  
32  
33

34 286 The HcV access model is hypothesized to be associated with lower use of preventive,  
35  
36 287 psychiatric, psychotherapeutic (outpatient) care and therapeutic devices if use of these  
37  
38  
39 288 services is postponed or considered as non-urgent by the municipalities. As a consequence,  
40  
41 289 we expect lower health care expenditures for outpatient care per capita (per quarter) in  
42  
43  
44 290 municipalities using the HcV model compared to municipalities with eHC model.  
45  
46

47 291 Health care expenditure per capita and quarter in the municipalities will thus be differentiated  
48  
49 292 according to inpatient, outpatient and emergency care and interpreted against the backdrop  
50  
51  
52 293 of the results from the analysis of realized access. More detailed analysis of expenditures for  
53  
54 294 specific health services will not be feasible as information on expenditures are only available  
55  
56  
57 295 on aggregated level.  
58  
59

60 296 *Covariates or confounders*



297 The major determinant of health care use we are interested in is the access model used in the  
 298 municipalities. However, health care policies and their implementation as locally diverging  
 299 access models are only one of many determinants of health care use. Andersen and colleagues  
 300 identified several additional determinants of health care use, with the health system being  
 301 just one of them and access models being just one element of the health system.[18] Thus, a  
 302 much broader approach is needed given that confounding by other determinants of use of  
 303 health care services is probable. We thus adapted Andersen's general model of Health Service  
 304 Use with regard to our research setting and analyze the availability of data or information for  
 305 the different determinants (c.f. [18,38]).

306 **Table 1: Determinants of health care utilization according to Andersen (1995)**

|                                     | <b>Explanation and concretization<br/>(adapted from [18])</b>            | <b>Availability of information</b>                                                                                                                                                                                                               |
|-------------------------------------|--------------------------------------------------------------------------|--------------------------------------------------------------------------------------------------------------------------------------------------------------------------------------------------------------------------------------------------|
| <b>Predisposing characteristics</b> |                                                                          |                                                                                                                                                                                                                                                  |
| <b>Demographics</b>                 | Age, sex                                                                 | Aggregated data available for all municipalities; individual level data only available from municipalities with eHC                                                                                                                              |
| <b>Social structure</b>             | Socio-economic status, origin/nationality                                | Not available                                                                                                                                                                                                                                    |
| <b>Health beliefs</b>               | Attitudes, values, and knowledge about health or health services         | Not available                                                                                                                                                                                                                                    |
| <b>Enabling resources</b>           |                                                                          |                                                                                                                                                                                                                                                  |
| <b>Individual /family</b>           | Financial means, health insurances                                       | Not available; entitlements to benefits according to AsylbLG are need-based and thus these regulations apply only to people whose financial means are generally limited and who do not have a valid health insurance in Germany (Art. 7 AsylbLG) |
| <b>Community</b>                    | Availability of health personnel and facilities, travel and waiting time | Limited availability: density of general practitioners and specialized doctors [39,40]                                                                                                                                                           |
| <b>Social relationships</b>         | Social support                                                           | Not available                                                                                                                                                                                                                                    |
| <b>Need</b>                         |                                                                          |                                                                                                                                                                                                                                                  |
| <b>Perceived need</b>               | Subjective health                                                        | Not available                                                                                                                                                                                                                                    |

|                                  |                                                                                             |                                                                                                                                                                                                                                                                                                                       |
|----------------------------------|---------------------------------------------------------------------------------------------|-----------------------------------------------------------------------------------------------------------------------------------------------------------------------------------------------------------------------------------------------------------------------------------------------------------------------|
| <b>Evaluated need</b>            | Professional judgments about health care needs (e.g. diagnoses)                             | Only available for those who actually used health care and even among those who used health care limited to the condition for which health care was used; the number of severe cases with annual individual health care costs of more than 35.000 € are known for municipalities due to state refunding policies [12] |
| <b>Health care system</b>        |                                                                                             |                                                                                                                                                                                                                                                                                                                       |
| <b>Policy</b>                    | Macro characteristics of the health system not further specified by Andersen and colleagues | With exception of the access model and its implementation, this should be the same for all municipalities in NRW                                                                                                                                                                                                      |
| <b>Resources</b>                 |                                                                                             |                                                                                                                                                                                                                                                                                                                       |
| <b>Organization</b>              |                                                                                             |                                                                                                                                                                                                                                                                                                                       |
| <b>External environment</b>      |                                                                                             |                                                                                                                                                                                                                                                                                                                       |
| <b>Physical</b>                  | Natural and build environment                                                               | Availability very limited: information on types of accommodation in municipalities (central or decentralized) [16]                                                                                                                                                                                                    |
| <b>Political</b>                 | Political context (global, national, state, local)                                          | No difference between municipalities for global, national and state level; local level: information on population size, organizational structure (e.g. independent city, county-affiliated) [41] and results from local elections as well as the political party of the ruling major [42]                             |
| <b>Economic</b>                  | Economic structure                                                                          | No difference between municipalities for global, national and state level; local level: data available for municipalities in Germany (unemployment rate, average household purchasing power, age-structure) [41]                                                                                                      |
| <b>Health practices</b>          |                                                                                             |                                                                                                                                                                                                                                                                                                                       |
| <b>Personal health practices</b> | Diet, exercise, self-care (not related to seeking care)                                     | Not available                                                                                                                                                                                                                                                                                                         |

307

308 Table 1 shows that there are important individual-level determinants of use that we are not  
 309 able to consider (especially socio-economic status, health beliefs, individual enabling  
 310 resources, need and personal health practices). Given that refugees are almost randomly  
 311 assigned to the municipalities, our study can be considered as a natural experiment or a quasi-

1  
2  
3 312 experimental study. Under these quasi-experimental conditions, the determinants should be  
4  
5 313 independent of the access model. As a result, confounding by these determinants of use  
6  
7  
8 314 should be minimal. We will still control for significant differences in demographic  
9  
10 315 characteristics that persist despite random assignment, based on the available aggregated  
11  
12  
13 316 data on sex and age. In addition, information on important contextual, health system, and  
14  
15 317 community related determinants are available, as listed in Table 1. This is the case for  
16  
17 318 availability of doctors, overall socio-demographic, economic and political context. Adjustment  
18  
19 319 for these aspects is thus possible at municipality level. However, we will be unable to control  
20  
21 320 for confounding by other individual level determinants, e.g. health beliefs or needs and  
22  
23 321 clustering by family relations or country of origin. We will acknowledge these limitations when  
24  
25 322 discussing the results.  
26  
27  
28  
29  
30

### 31 **Planned statistical analysis**

32  
33  
34 324 We aim to shed light on the development of health inequalities in the socially critical phase  
35  
36 325 refugees face immediately after arrival in Germany and the importance of the local context in  
37  
38 326 providing access to health care. However, we analyze inequalities only in the sense of  
39  
40 327 (descriptive) differences and not in the sense of inequities which would constitute a separate  
41  
42 328 interpretative step.  
43  
44  
45  
46

47 329 Incidence rates and relative risks of all five outcomes will be analyzed for seven quarters  
48  
49 330 comparing municipalities with eHC and with HcV. Timing and pathways of care will also be  
50  
51 331 explored. Analysis will be adjusted for aggregated information on age and sex provided by the  
52  
53 332 municipalities. As part of the descriptive analysis we will also compare health care  
54  
55 333 expenditures in the municipalities. Subsequently, we will perform a multivariate regression  
56  
57 334 analysis. As the detailedness of the data is limited (few municipalities and no individual level  
58  
59  
60

1  
2  
3 335 data on age and sex), we will explore different possible approaches to statistical analysis and  
4  
5 336 compare the results. In ecological analysis, we will use general linear regression models with  
6  
7  
8 337 quarterly incidence rates in the six municipalities as outcomes. In individual level analysis, we  
9  
10 338 will include each of the outcomes as (dependent) outcome variable, the access model as  
11  
12 339 (independent) exposure variable and conduct repeated (7 quarters) cross-sectional regression  
13  
14  
15 340 analysis. In both cases, we will include the age-sex distribution, socio-economic and political  
16  
17 341 structure of the community and density of general and specialized practitioners respectively  
18  
19 342 as covariates in the regression models (c.f. Table 1). Table 2 summarizes the most important  
20  
21 343 methodological aspects of this study.  
22  
23  
24  
25

26 344 **Table 2: Overview and brief explanation of the methodological approach of the study**

| Methods overview       | Explanation                                                                                                                                                                                                                                                                                                                                                                                                                                                    |
|------------------------|----------------------------------------------------------------------------------------------------------------------------------------------------------------------------------------------------------------------------------------------------------------------------------------------------------------------------------------------------------------------------------------------------------------------------------------------------------------|
| <b>Study design</b>    | Quasi-experimental                                                                                                                                                                                                                                                                                                                                                                                                                                             |
| <b>Sample</b>          | 9500 newly arrived refugees (4750 per access model) in six municipalities in the federal state of NRW, Germany                                                                                                                                                                                                                                                                                                                                                 |
| <b>Study period</b>    | 2/2016 to 4/2017                                                                                                                                                                                                                                                                                                                                                                                                                                               |
| <b>Main hypothesis</b> | The local access model (HcV vs. eHC) and its implementation influences the access to health care for newly arrived refugees, leading to differences in realized access between models.                                                                                                                                                                                                                                                                         |
| <b>Sub hypotheses</b>  | <ol style="list-style-type: none"> <li>1) Emergency care: Using the HcV model leads to higher use of emergency care services compared to the eHC model</li> <li>2) Delayed treatment: Using the HcV model leads to higher rates of ambulatory care sensitive conditions (ACSC) compared to the eHC model</li> <li>3) Non-urgency of treatment: Using the HcV model leads to lower use of (deferrable) outpatient services compared to the eHC model</li> </ol> |
| <b>Outcomes</b>        | Quarterly incidence rates (IR) and relative risks (RR) of emergency cases (1), ACSC (2) and use of (deferrable) outpatient services (3)                                                                                                                                                                                                                                                                                                                        |
| <b>Analyses</b>        | For each of the three outcomes we will perform: <ul style="list-style-type: none"> <li>- descriptive analysis of IR and RR for seven quarters</li> <li>- individual level analysis: logistic regression analysis</li> <li>- ecological analysis: generalized linear models</li> </ul>                                                                                                                                                                          |

27  
28  
29  
30  
31  
32  
33  
34  
35  
36  
37  
38  
39  
40  
41  
42  
43  
44  
45  
46  
47  
48  
49  
50  
51  
52  
53  
54  
55  
56 345

57  
58  
59 346 **Public and patient involvement**  
60

1  
2  
3 347 The quantitative study described here is embedded in a larger mixed-methods project. As part  
4  
5  
6 348 of the project, we have conducted qualitative semi-structured interviews (not described in  
7  
8 349 detail here) with refugees and other informants from one of the six municipalities. The  
9  
10 350 perspectives of the interview participants informed the hypotheses and the selection of  
11  
12  
13 351 suitable outcomes. The final results will be made available to refugee patients through social  
14  
15 352 workers in the six municipalities. As data was collected through local welfare offices and  
16  
17  
18 353 statutory health insurances and not directly from patients, there was no further patient or  
19  
20 354 public involvement in recruitment or conduct of the study.  
21  
22

## 23 355 **ETHICS AND DISSEMINATION**

24  
25  
26  
27 356 To avoid ethical issues, we cooperated with local welfare offices and the statutory health  
28  
29  
30 357 insurance to collect data on use of health care among newly arrived refugees. We ensured  
31  
32 358 that data collection would lead to fully anonymized (and even partly aggregated) data, so  
33  
34  
35 359 there was no need to seek consent from individuals and conduct interviews. This approach  
36  
37 360 and the full study have been approved by the ethical committee and the data protection office  
38  
39 361 at Bielefeld University (application no. 2017-099, 10<sup>th</sup> May 2017).  
40  
41

42 362 We developed a data protection concept in close cooperation with the data protection officer  
43  
44  
45 363 and our study data trustee. Data will be managed, analyzed and stored on encoded offline  
46  
47  
48 364 servers. Ten years after the end of the study, the data trustee will delete the data. When  
49  
50 365 publishing our results, we will adhere to the STROBE guidelines.[43] Results will be published  
51  
52 366 in peer-reviewed journals and summarized in reports to the funding agency.  
53  
54

55 367

56 368

369 **LITERATURE**

- 370 1 Norredam M, Mygind A, Krasnik A. Access to health care for asylum seekers in the  
371 European Union- A comparative study of country policies. *Eur J Public Health*  
372 2006;**16**:285–9. doi:10.1093/eurpub/cki191
- 373 2 International Organization for Migration (IOM) Regional Office Brussels. Migration  
374 Health Division (MHD). *Summary Report on the MIPEX Health Strand and Country*  
375 *Reports*. Brussels: : International Organization for Migration (IOM) Regional Office  
376 Brussels, Migration Health Division (MHD) 2016.  
377 [http://members.costadapt.eu/images/3/33/MIPEX\\_11\\_June\\_final.pdf](http://members.costadapt.eu/images/3/33/MIPEX_11_June_final.pdf)
- 378 3 Eichenhofer E. Gesundheitsleistungen für Flüchtlinge. *Zeitschrift für Ausländerr und*  
379 *Ausländerpolitik* 2013;**33**:169–75.
- 380 4 Ooms G, Hammonds R. Global constitutionalism, responsibility to protect, and extra-  
381 territorial obligations to realize the right to health: time to overcome the double  
382 standard (once again). *Int J Equity Heal* 2014;**13**:68. doi:10.1186/s12939-014-0068-4
- 383 5 Wild V. Universal Access to Health Care for Migrants: Applying Cosmopolitanism to  
384 the Domestic Realm. *Public Health Ethics* 2015;**8**:162–72. doi:10.1093/phe/phv014
- 385 6 Bartley M, Blane D, Montgomery S. Health and the life course: why safety nets matter.  
386 *BMJ Br Med J* 1997;**314**:1194–6.
- 387 7 Razum O, Wenner J, Bozorgmehr K. Wenn Zufall über den Zugang zur  
388 Gesundheitsversorgung bestimmt: Geflüchtete in Deutschland. *Das Gesundheitswes*  
389 2016;**78**:711–4. doi:10.1055/s-0042-116231
- 390 8 Bauhoff S, Göppfarth D. Asylum-seekers in Germany differ from regularly insured in  
391 their morbidity, utilizations and costs of care. *PLoS One* 2018;**13**:1–11.  
392 doi:10.1371/journal.pone.0197881

- 1  
2  
3 393 9 Spura A, Kleinke M, Robra BP, *et al.* Wie erleben Asylsuchende den Zugang zu  
4  
5 394 medizinischer Versorgung? *Bundesgesundheitsblatt - Gesundheitsforsch -*  
6  
7  
8 395 *Gesundheitsschutz* 2017;**60**:462–70. doi:10.1007/s00103-017-2525-x  
9  
10 396 10 Wächter-Raquet M. *Einführung der Gesundheitskarte für Asylsuchende und*  
11  
12 *Flüchtlinge. Der Umsetzungsstand im Überblick der Bundesländer.* Gütersloh: :  
13 397 Bertelsmann Stiftung 2016.  
14  
15 398  
16  
17 399 11 Behörde für Arbeit Soziales Familie und Integration der Freien und Hansestadt  
18  
19 Hamburg. Gesundheitsversorgung Ausländer. Best Practice Beispiele aus Hamburg.  
20 400 Bericht der Fachtagung am 8. Dezember 2014 in der Landesvertretung Hamburg in  
21  
22 401 Berlin. Hamburg: 2014.  
23  
24  
25 402  
26  
27 403 12 Landtag Nordrhein-Westfalen. Gesetz über die Zuweisung und Aufnahme  
28  
29 ausländischer Flüchtlinge (Flüchtlingsaufnahmegesetz - FlüAG) vom 28. Februar 2003.  
30 404  
31  
32 405 Düsseldorf: 2003.  
33  
34  
35 406 13 Bozorgmehr K, Razum O. Effect of Restricting Access to Health Care on Health  
36  
37 407 Expenditures among Asylum-Seekers and Refugees: A Quasi-Experimental Study in  
38  
39 408 Germany, 1994–2013. *PLoS One* 2015;**10**:e0131483.  
40  
41  
42 409 doi:10.1371/journal.pone.0131483  
43  
44  
45 410 14 Claassen K, Jäger P. Impact of the Introduction of the Electronic Health Insurance Card  
46  
47 411 on the Use of Medical Services by Asylum Seekers in Germany. *Int J Environ Res Public*  
48  
49 412 *Health* 2018;**15**:856. doi:10.3390/ijerph15050856  
50  
51  
52 413 15 Coleman JS. *Foundations of Social Theory.* Cambridge: : Harvard University Press 1990.  
53  
54 414 16 Landesbetrieb Information und Technik Nordrhein-Westfalen. *Empfängerinnen und*  
55  
56 415 *Empfänger von Asylbewerberleistungen in Nordrhein-Westfalen 2010 bis 2017*  
57  
58 416 *(unpublished).* Düsseldorf: 2018.  
59  
60

- 1  
2  
3 417 17 Ministerium für Arbeit Gesundheit und Soziales des Landes Nordrhein-Westfalen.  
4  
5  
6 418 Rahmenvereinbarung zur Übernahme der Gesundheitsversorgung für nicht  
7  
8 419 Versicherungspflichtige gegen Kostenerstattung nach § 264 Absatz 1 SGB V in  
9  
10 420 Verbindung mit §§ 1,1a Asylbewerberleistungsgesetz in Nordrhein-Westfalen.  
11  
12  
13 421 2015. [https://www.mags.nrw/sites/default/files/asset/document/rahmenvereinbarung\\_online.pdf](https://www.mags.nrw/sites/default/files/asset/document/rahmenvereinbarung_online.pdf) (accessed 5 Apr 2018).  
14  
15 422  
16  
17 423 18 Andersen RM. Revisiting the Behavioral Model and Access to Medical Care: Does it  
18  
19 424 Matter? *Am Sociol Assoc* 1995;**36**:1–10.  
20  
21  
22 425 19 Penchansky R, Thomas JW. The Concept of Access. Definition and Relationship to  
23  
24 426 Consumer Satisfaction. *Med Care* 1981;**19**:127–40.  
25  
26  
27 427 20 Bozorgmehr K, Schneider C, Joos S. Equity in access to health care among asylum  
28  
29 428 seekers in Germany: evidence from an exploratory population-based cross-sectional  
30  
31 429 study. *BMC Health Serv Res* 2015;**15**:502. doi:10.1186/s12913-015-1156-x  
32  
33  
34 430 21 Wenner J, Razum O, Schenk L, *et al.* Gesundheit von Kindern und Jugendlichen aus  
35  
36 431 Familien mit ungesichertem Aufenthaltsstatus im Vergleich zu Kindern mit und ohne  
37  
38 432 Migrationshintergrund: Auswertung der KiGGS-Daten 2003–06.  
39  
40 433 *Bundesgesundheitsblatt - Gesundheitsforsch - Gesundheitsschutz* 2016;**59**:627–35.  
41  
42 434 doi:10.1007/s00103-016-2338-3  
43  
44  
45 435 22 Gee GC, Ro A, Shariff-Marco S, *et al.* Racial discrimination and health among asian  
46  
47 436 americans: Evidence, assessment, and directions for future research. *Epidemiol Rev*  
48  
49 437 2009;**31**:130–51. doi:10.1093/epirev/mxp009  
50  
51  
52 438 23 Zentrale Ethikkommission bei der Bundesärztekammer (ZEKO). Versorgung von nicht  
53  
54 439 regulär krankenversicherten Patienten mit Migrationshintergrund. *Dtsch Arztebl*  
55  
56 440 2013;**110**:A899-903.  
57  
58  
59  
60



- 1  
2  
3 441 24 Agency for Healthcare Research and Quality. *AHRQ Quality Indicators. Guide to*  
4  
5  
6 442 *prevention quality indicators: hospital admission for ambulatory care sensitive*  
7  
8 443 *conditions*. Rockville: : AHRQ Pub 2007. doi:10.1017/CBO9781107415324.004  
9  
10 444 25 Faisst C, Sundmacher L. Ambulant-sensitive Krankenhausfälle: Eine internationale  
11  
12  
13 445 Übersicht mit Schlussfolgerungen für einen deutschen Katalog. *Das Gesundheitswes*  
14  
15 446 2014;**77**:168–77. doi:10.1055/s-0034-1377033  
16  
17  
18 447 26 Ansari Z, Laditka JN, Laditka SB. Access to health care and hospitalization for  
19  
20 448 ambulatory care sensitive conditions. *Med Care Res Rev* 2006;**63**:719–41.  
21  
22 449 doi:10.1177/1077558706293637  
23  
24  
25 450 27 Basu J, Friedman B, Burstin H. Primary care, HMO enrollment, and hospitalization for  
26  
27 451 ambulatory care sensitive conditions: a new approach. *Med Care* 2002;**40**:1260–9.  
28  
29 452 doi:10.1097/01.MLR.0000036409.56436.ED  
30  
31  
32 453 28 Rosano A, Loha CA, Falvo R, *et al*. The relationship between avoidable hospitalization  
33  
34 454 and accessibility to primary care: A systematic review. *Eur J Public Health*  
35  
36 455 2013;**23**:356–60. doi:10.1093/eurpub/cks053  
37  
38  
39 456 29 Lichtl C, Gewalt SC, Noest S, *et al*. Potentially avoidable and ambulatory care sensitive  
40  
41 457 hospitalisations among forced migrants: a protocol for a systematic review and meta-  
42  
43 458 analysis. *BMJ Open* 2016;**6**:e012216. doi:10.1136/bmjopen-2016-012216  
44  
45  
46  
47 459 30 Lichtl C, Lutz T, Szecsenyi J, *et al*. Differences in the prevalence of hospitalizations and  
48  
49 460 utilization of emergency outpatient services for ambulatory care sensitive conditions  
50  
51 461 between asylum-seeking children and children of the general population: A cross-  
52  
53 462 sectional medical records study. *BMC Health Serv Res* 2017;**17**:1–9.  
54  
55 463 doi:10.1186/s12913-017-2672-7  
56  
57  
58  
59 464 31 Sundmacher L, Schüttig W, Faisst C. Ein konsentierter deutscher Katalog ambulant-  
60

- 1  
2  
3 465 sensitiver Diagnosen. *Versorgungsatlas* 2015;**18**.  
4  
5  
6 466 32 Sundmacher L, Fischbach D, Schuettig W, *et al*. Which hospitalisations are ambulatory  
7  
8 467 care-sensitive, to what degree, and how could the rates be reduced? Results of a  
9  
10 468 group consensus study in Germany. *Health Policy (New York)* 2015;**119**:1415–23.  
11  
12  
13 469 doi:10.1016/j.healthpol.2015.08.007  
14  
15 470 33 Crawley LM, Ahn DK, Winkleby MA. Perceived Medical Discrimination and Cancer  
16  
17 471 Screening Behaviors of Racial and Ethnic Minority Adults. *Cancer Epidemiol*  
18  
19 472 *Biomarkers Prev* 2008;**17**:1937–44. doi:10.1158/1055-9965.EPI-08-0005  
20  
21  
22 473 34 Trivedi AN, Ayanian JZ. Perceived discrimination and use of preventive health services.  
23  
24 474 *J Gen Intern Med* 2006;**21**:553–8. doi:10.1111/j.1525-1497.2006.00413.x  
25  
26  
27 475 35 Classen G. Rechtsprechungsübersicht zum Flüchtlingssozialrecht (seit 1993).  
28  
29 476 2015.<http://www.fluechtlingsinfo-berlin.de/fr/gesetzgebung/Urteile2.pdf> (accessed  
30  
31 477 10 Aug 2018).  
32  
33  
34 478 36 Ministerium für Arbeit Gesundheit und Soziales des Landes Nordrhein-Westfalen.  
35  
36 479 Rahmenvereinbarung zur Übernahme der Gesundheitsversorgung für nicht  
37  
38 480 Versicherungspflichtige gegen Kostenerstattung nach § 264 Absatz 1 SGB V in  
39  
40 481 Verbindung mit §§ 1,1a Asylbewerberleistungsgesetz in Nordrhein-Westfalen. Anlage  
41  
42 482 1.  
43  
44 483 2015.[https://www.mags.nrw/sites/default/files/asset/document/leistungsumfang\\_an-](https://www.mags.nrw/sites/default/files/asset/document/leistungsumfang_anlage1_online.pdf)  
45  
46 484 [lage1\\_online.pdf](https://www.mags.nrw/sites/default/files/asset/document/leistungsumfang_anlage1_online.pdf) (accessed 5 Apr 2018).  
47  
48  
49  
50 485 37 Classen G. *Sozialleistungen für MigrantInnen und Flüchtlinge*. Karlsruhe: : Loeper  
51  
52 486 Literatur, Pro Asyl 2008.  
53  
54  
55 487 38 Janssen C, Swart E, v. Lengerke T. *Health Care Utilization in Germany. Theory,*  
56  
57 488 *Methodology, and Results*. New York: : Springer New York 2014.  
58  
59  
60

- 1  
2  
3 489 39 Schulz M, Schulz M, Bätzing-Feigenbaum J, *et al.* Vertragsärzte und -  
4  
5  
6 490 psychotherapeuten je 100.000 Einwohner nach Bedarfsplanungsfachgebieten und -  
7  
8 491 regionen im Jahr 2013. In: *Versorgungsatlas-Bericht Nr. 15/02*. Berlin: : Zentralinstitut  
9  
10 492 für die kassenärztliche Versorgung in Deutschland 2015.
- 11  
12  
13 493 40 Sundmacher L, Busse R. Der Einfluss der Ärztedichte auf ambulant-sensitive  
14  
15 494 Krankenhausfälle. In: Klauber J, Geraedts M, Friedrich J, *et al.*, eds. *Krankenhaus-*  
16  
17 *Report 2012*. Stuttgart: : Schattauer-Verlag 2012. 183–202.
- 18 495  
19  
20 496 41 Bertelsmann Stiftung. Wegweiser Kommune. 2018.<https://www.wegweiser->  
21  
22 [kommune.de/impressum](https://www.wegweiser-kommune.de/impressum) (accessed 6 Apr 2018).
- 23 497  
24  
25 498 42 Landeswahlleiter des Landes NRW. Wahlergebnisse in NRW. Kommunalwahlen 2014.  
26  
27 499 <https://www.wahlergebnisse.nrw.de/kommunalwahlen/2014/index.html>  
28  
29 (accessed 5 Apr 2018).
- 30 500  
31  
32 501 43 von Elm E, Altman DG, Egger M, *et al.* The Strengthening the Reporting of  
33  
34 502 Observational Studies in Epidemiology (STROBE) statement: guidelines for reporting  
35  
36 503 observational studies. *Plos Med* 2007;**4**:e296. doi:10.1371/journal.pmed.0040296  
37  
38  
39  
40  
41

## 505 List of Abbreviations

- 42  
43  
44  
45 506 ACSC Ambulatory care sensitive conditions  
46  
47 507 ACSH Ambulatory care sensitive hospitalizations  
48  
49  
50 508 AsylbLG Asylbewerberleistungsgesetz/Asylum Seeker's Benefits Act  
51  
52 509 eHC Electronic health card  
53  
54  
55 510 HcV Health care voucher  
56  
57 511 NRW Nordrhein-Westfalen/North Rhine-Westphalia  
58  
59  
60

1  
2  
3 514 **Acknowledgements**  
4  
5

6  
7 515 **Data sharing**  
8  
9

10 516 **There are no data in this work.**  
11  
12

13 517 **Ethics approval and consent to participate**  
14  
15

16 518 The study has been positively reviewed by the Ethics Committee and the data protection  
17 officer of Bielefeld University.  
18  
19

20 519 Application Number: 2017-099  
21  
22

23 520 Date: 10<sup>th</sup> May 2017  
24  
25

26 521 Consent was not obtained because the patient cannot be traced. However, there was no  
27 need to obtain consent, because data is fully anonymized.  
28  
29

30 522  
31 523  
32  
33 524 **Competing interests**  
34  
35

36 525 The authors declare that they have no competing interests.  
37  
38

39 526 **Funding**  
40  
41

42 527 The work was supported by the Ministry of Culture and Research of the Federal State of  
43 North Rhine-Westphalia (grant number 1704i010).  
44  
45

46 528 We acknowledge the financial support of the German Research Foundation (DFG) and the  
47 Open Access Publication Fund of Bielefeld University for the article processing charge.  
48  
49

50 529  
51 530  
52  
53 531 **Authors' contributions**  
54  
55

1  
2  
3 532 JW, KR und OR designed the study. JB, OS und KB made substantial contributions to its  
4  
5 533 conception and design. JW drafted the manuscript. KR, JB, OS, KB und OR revisited the  
6  
7  
8 534 manuscript critically for important intellectual content. All authors read and approved the  
9  
10 535 final manuscript.

11  
12  
13  
14 536 **Acknowledgements**

15  
16  
17 537 Not applicable

18  
19  
20 538  
21  
22  
23  
24  
25  
26  
27  
28  
29  
30  
31  
32  
33  
34  
35  
36  
37  
38  
39  
40  
41  
42  
43  
44  
45  
46  
47  
48  
49  
50  
51  
52  
53  
54  
55  
56  
57  
58  
59  
60

For peer review only

1  
2  
3  
4  
5  
6  
7  
8  
9  
10  
11  
12  
13  
14  
15  
16  
17  
18  
19  
20  
21  
22  
23  
24  
25  
26  
27  
28  
29  
30  
31  
32  
33  
34  
35  
36  
37  
38  
39  
40  
41  
42  
43  
44  
45  
46  
47  
48  
49  
50  
51  
52  
53  
54  
55  
56  
57  
58  
59  
60

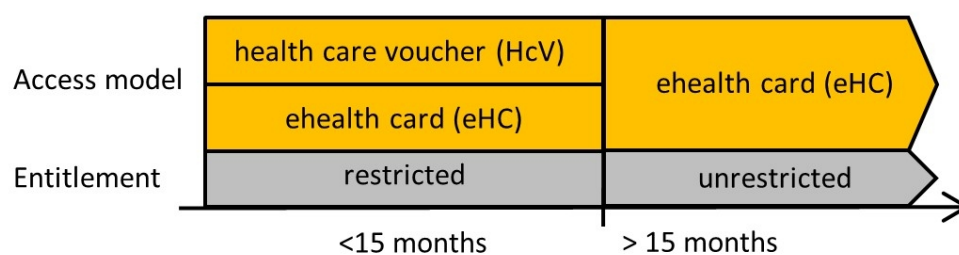

Simplified overview of local access models and entitlements in municipalities in Germany

90x90mm (300 x 300 DPI)

1  
2  
3  
4  
5  
6  
7  
8  
9  
10  
11  
12  
13  
14  
15  
16  
17  
18  
19  
20  
21  
22  
23  
24  
25  
26  
27  
28  
29  
30  
31  
32  
33  
34  
35  
36  
37  
38  
39  
40  
41  
42  
43  
44  
45  
46  
47  
48  
49  
50  
51  
52  
53  
54  
55  
56  
57  
58  
59  
60

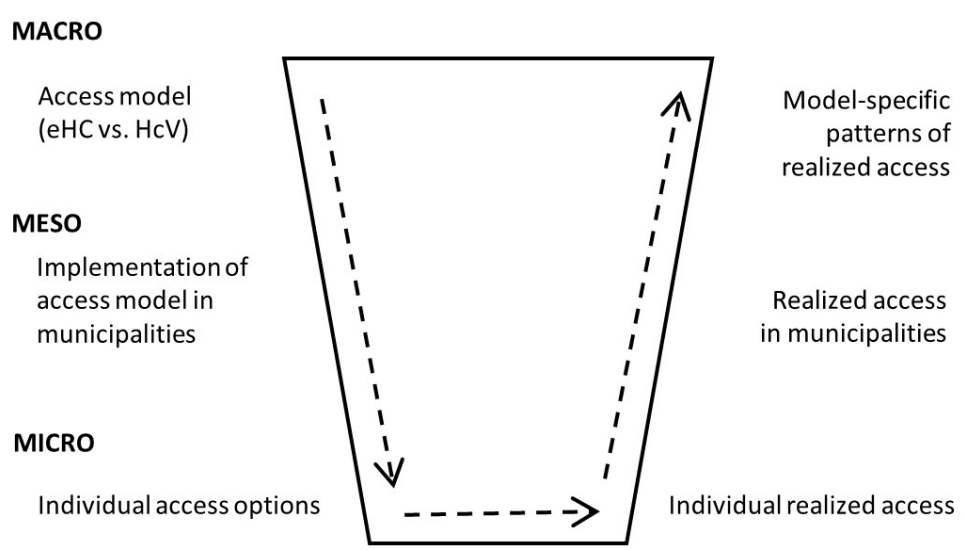

Graphical summary of the overall study hypothesis

90x90mm (300 x 300 DPI)
